REVIEW

# Unlocking the blueprint to eliminating neglected tropical diseases: A review of efforts in 50 countries that have eliminated at least 1 NTD

Helmi Hietanen<sup>1\*</sup>, Lorraine Tsitsi Pfavayi<sup>2,3</sup>, Francisca Mutapi<sup>2,3</sup>

**1** School of Biological Sciences, University of Edinburgh, King's Buildings, Edinburgh, United Kingdom, **2** Institute of Immunology & Infection Research, University of Edinburgh, Ashworth Laboratories, Edinburgh, United Kingdom, **3** Tackling Infections to Benefit Africa (TIBA) Partnership, University of Edinburgh, Ashworth Laboratories, Edinburgh, United Kingdom

\* [aurora.hietanen@gmail.com](mailto:aurora.hietanen@gmail.com)

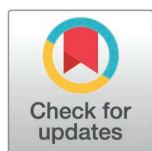

## Abstract

### Background

Neglected tropical diseases (NTDs) are a group of 21 diseases affecting approximately 1.5 billion people globally. Significant progress has been made in their control: by March 2024, 50 countries had eliminated at least one NTD, with 13 of these countries eliminating at least two. Togo achieved the highest milestone, having eliminated four. The eight NTDs eliminated in at least one country are Guinea worm disease, human African trypanosomiasis, lymphatic filariasis, onchocerciasis, rabies, trachoma, visceral leishmaniasis and yaws. We reviewed elimination efforts of these 50 countries to identify factors underlying their successes and failures to generate a blueprint to inform the acceleration of NTD elimination.

### Methodology/principal findings

We conducted a review of published and grey literature and extracted and recorded data on various features of the elimination programmes, including the durations and organisers of elimination efforts, interventions, strategies including mainstreaming into other health services, partnerships involved, and details of historical failed control efforts. These data were synthesised to generate a blueprint for NTD elimination. Key features of successful NTD elimination included country ownership, dedicated elimination efforts, and use of a combination of strategies. Most elimination programmes targeted one NTD at a time, while fewer utilised integrated approaches. Elimination required at least two decades of sustained efforts and partnerships between the endemic country and international stakeholders. Failure in historical efforts was frequently a result of sociopolitical instability, insufficient resources, deprioritisation, lack of effective interventions, or lax implementation of interventions.

## OPEN ACCESS

**Citation:** Hietanen H, Pfavayi LT, Mutapi F (2025) Unlocking the blueprint to eliminating neglected tropical diseases: A review of efforts in 50 countries that have eliminated at least 1 NTD. PLoS Negl Trop Dis 19(9): e0013424. <https://doi.org/10.1371/journal.pntd.0013424>

**Editor:** María Victoria Periago, Consejo Nacional de Investigaciones Científicas y Técnicas, Fundación Mundo Sano, ARGENTINA

**Published:** September 4, 2025

**Copyright:** © 2025 Hietanen et al. This is an open access article distributed under the terms of the [Creative Commons Attribution License](https://creativecommons.org/licenses/by/4.0/), which permits unrestricted use, distribution, and reproduction in any medium, provided the original author and source are credited.

**Funding:** This work was supported by the Scottish Funding Council Global Challenges Research Fund Grant to FM (<https://www.sfc.ac.uk/>). FM is also funded by the Academy of Medical Sciences, GCRFNGR81529 (<https://acmedsci.ac.uk/>), and the Aspen Advanced Global Innovators Program (<https://www.aspenglobalinnovators.org/>). LP is supported by the Thrasher Research Fund, 02195 (<https://www.thrasherfund.org/>).

[www.thrasherresearch.org/](http://www.thrasherresearch.org/)). The funders had no role in study design, data collection and analysis, decision to publish, or preparation of the manuscript.

**Competing interests:** The authors have declared that no competing interests exist.

## Conclusions/significance

Accelerating NTD elimination requires sustained, intense, and multisectoral approaches. In addition, mainstreaming within the health system, improved cross-cutting One Health strategies including water, sanitation and hygiene, and sustained financing are critical for elimination. While this study provides valuable insights, limitations due to documentation gaps and secondary sources highlight the need for improved data reporting and future research to strengthen elimination frameworks.

## Author summary

The World Health Organization has set a target of 100 countries each eliminating at least one neglected tropical disease (NTD) by 2030. By March 2024, we had reached half that target with 50 countries each eliminating at least one NTD. These countries provide an opportunity to learn lessons that can inform elimination efforts in other countries. Thus, we have studied the NTD elimination programmes of these 50 countries to develop a blueprint detailing common characteristics of successful and unsuccessful NTD elimination efforts. We identified the following as key components of successful elimination: country ownership of the programmes, dedicated elimination programmes, and development partner support. Our investigation also showed that elimination required sustained efforts, with elimination frequently taking approximately two decades. Most elimination programmes targeted a single NTD at a time. Moreover, the study showed the need for intensification of cross-sectoral interventions including water, sanitation and hygiene (WASH), prioritisation of NTD control in national health strategies, and increased domestic and international funding. Failed historical elimination efforts were characterised by disruption due to various factors including socio-political instability and insufficient resources. This underscores the importance of sustained and well-financed elimination programmes.

## Introduction

Neglected tropical diseases (NTDs) are a group of 21 preventable and treatable diseases [1,2] caused predominantly by a variety of pathogens including viruses, bacteria, fungi, helminths, protozoan and ecto-parasites, and toxins [3–5]. NTDs afflict an estimated 1.5 billion people globally [2,6], and result in the annual loss of approximately 19 million disability-adjusted life years (DALYs) [7]. Consequences of NTDs include disfigurement, debilitation and disability, which often lead to stigmatisation, discrimination, productivity losses, and hindered educational and socioeconomic advancement [4,7].

More widely, NTDs impede progress towards several of the targets of the United Nations' (UN) poverty, health and education Sustainable Development Goals (SDGs) [4,8,9]. For example, annual NTD-related losses of household wages and

income are estimated at 33 billion US dollars [10]. According to the World Health Organization (WHO), eliminating NTD-related household health expenses and lost productivity would result in a benefit of over 342 billion US dollars between 2015 and 2030. Efforts to combat NTDs are widely regarded as ‘best buys’ in both global health and development as investment in NTD control and elimination yields substantial returns by reducing morbidity, mortality, poverty, economic disparities, and health inequities [10]. Furthermore, NTDs are a One Health issue with interdependency between human, animal, and ecosystem health due to the transmission cycles of most NTDs involving animal reservoirs, vectors, and environmental components [11].

It is therefore unsurprising that there are currently global efforts to control and eliminate NTDs in order to reduce human suffering, promote economic development, and progress toward One Global Health. The WHO’s second road map for NTDs details the global vision and goals for the prevention, control, elimination, and eradication of NTDs for 2021–2030 [4]. These goals align with the SDGs and the WHO’s 13th General Programme of Work, and include 1) 100 countries eliminating at least one NTD and 2) the eradication of two NTDs, Guinea worm disease and yaws, by 2030. Encouraging progress has been made towards these targets. By December 2023, 50 countries in the world had already eliminated at least one NTD [12], reaching the halfway mark of the WHO’s goal of 100 countries by 2030 ahead of schedule (Fig 1). By June 2025, this number of countries had risen to 56 with Chad, Jordan, Brazil, Timor-Leste, Guinea, and Papua New Guinea having eliminated their first NTDs [13–18]. By March 2024, the end date of the current review period, eight of the 21 NTDs had been eliminated in at least one country each [12,19]. These eight are: Guinea worm disease (GWD), human African trypanosomiasis gambiense and rhodesiense (gHAT and rHAT, respectively; together known as HAT), lymphatic

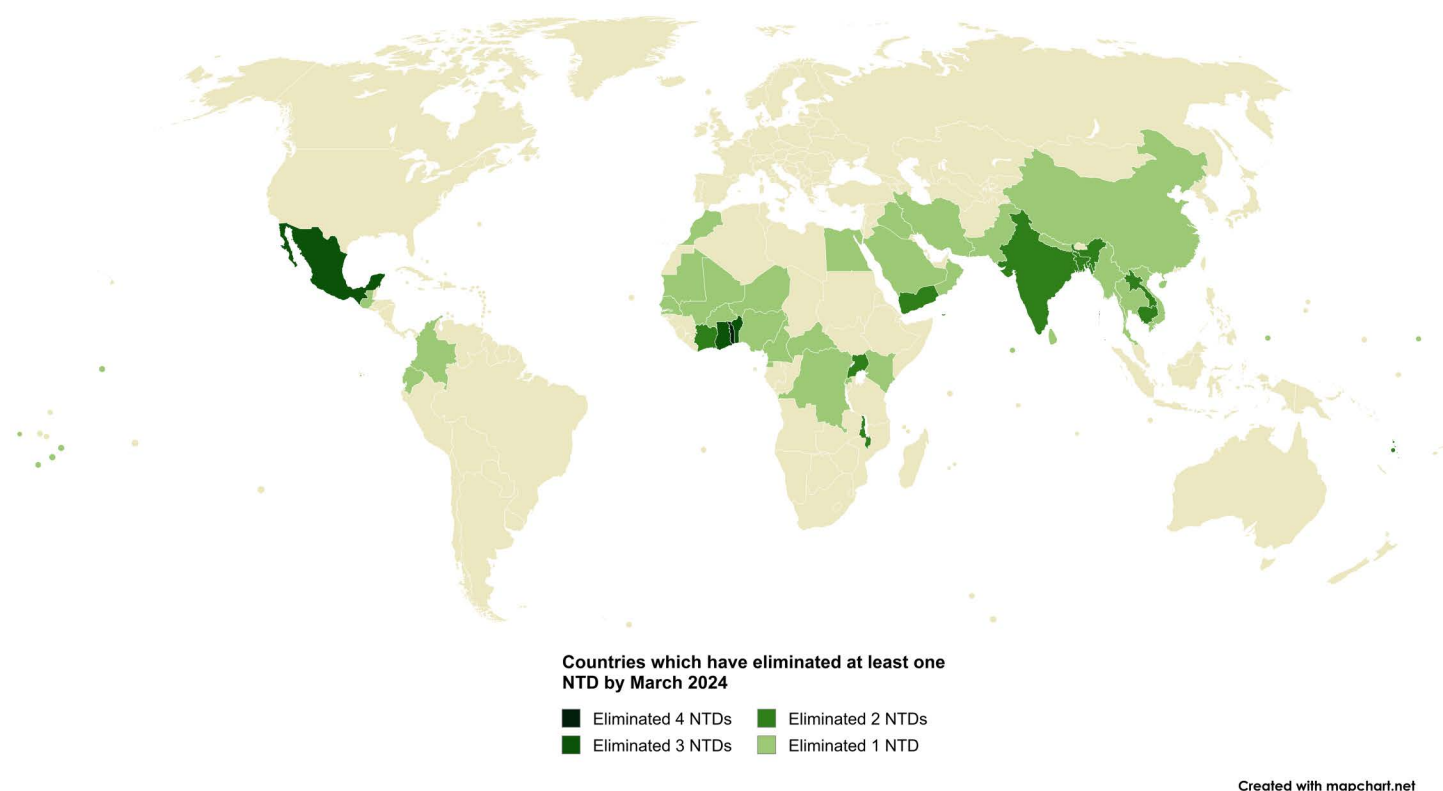

**Fig 1. Map of the 50 countries in the world which had each eliminated one or more NTDs by March 2024.** Produced on MapChart using the World Map: Microstates base map: [www.mapchart.net/detworld.html](http://www.mapchart.net/detworld.html). Terms of Use available at: [www.mapchart.net/terms.html#licensing-maps](http://www.mapchart.net/terms.html#licensing-maps). References: [12].

<https://doi.org/10.1371/journal.pntd.0013424.g001>

filaria (LF), onchocerciasis (ONCHO), dog-transmitted human rabies, trachoma, visceral leishmaniasis (VL), and yaws. The pathogen names, general disease characteristics, and countries where each NTD has been eliminated under specific criteria by March 2024, are listed in [Table 1](#).

Out of the 50 countries, 46 had achieved NTD elimination specifically as public health problem (PHP) for one or more NTDs. This elimination is defined by the WHO as reducing NTD occurrence to a level where it no longer poses a public health threat, based on clinical symptoms and infection burden [4,31]. Additionally, 22 countries out of the 50 had eliminated one or more NTDs with interruption of transmission (IoT), which the WHO defines as bringing transmission to zero within a region – an achievement that is more challenging. These 46 and 22 countries within the total 50 overlap since different NTDs have been targeted for either PHP or IoT elimination. The WHO's NTD-specific elimination definitions for the

**Table 1. The eight NTDs eliminated (PHP or IoT) in at least one country by March 2024.**

| Eliminated NTDs                                                             | Causative agents, transmission, disease picture                                                                                                                                                        | Countries having achieved elimination by March 2024 {total count of countries}                                                                                                                         | NTD-specific elimination criteria (PHP/IoT)                                                                                                                                                 |
|-----------------------------------------------------------------------------|--------------------------------------------------------------------------------------------------------------------------------------------------------------------------------------------------------|--------------------------------------------------------------------------------------------------------------------------------------------------------------------------------------------------------|---------------------------------------------------------------------------------------------------------------------------------------------------------------------------------------------|
| Guinea worm disease (dracunculiasis)                                        | Caused by <i>Dracunculus medinensis</i> worm; transmission via contaminated drinking water; infected persons become incapacitated for weeks as worm painfully emerges through skin [4]                 | Benin, Burkina Faso, Cameroon, Central African Republic, Côte d'Ivoire, Democratic Republic of the Congo, Ghana, India, Kenya, Mauritania, Niger, Nigeria, Pakistan, Senegal, Togo, Uganda, Yemen {17} | IoT: passing 3 consecutive years without indigenous cases while upholding active surveillance [20,21]                                                                                       |
| Human African trypanosomiasis gambiense and rhodesiense (sleeping sickness) | Caused by <i>Trypanosoma brucei gambiense</i> and <i>rhodesiense</i> protozoans; transmission via tsetse fly bite; result in chronic (gHAT) or acute (rHAT) infection, fatal without treatment [4,22]  | gHAT: Benin, Côte d'Ivoire, Equatorial Guinea, Ghana, Togo, Uganda {6};<br>rHAT: Rwanda {1}                                                                                                            | PHP: < 1 cases in a population of 10,000 people in all country districts for five consecutive years [23]                                                                                    |
| Lymphatic filariasis (elephantiasis)                                        | Caused by filarial worm parasites <i>Wuchereria bancrofti</i> , <i>Brugia malayi</i> , <i>B. timori</i> ; transmission via mosquitoes; results in lymphatic vessel damage, lymphoedema, hydrocoele [4] | Bangladesh, Cambodia, Cook Islands, Egypt, Kiribati, Laos, Malawi, Maldives, Marshall Islands, Niue, Palau, Sri Lanka, Thailand, Togo, Tonga, Vanuatu, Vietnam, Wallis and Futuna, Yemen {19}          | PHP: infection prevalence below a measured threshold, minimum morbidity and disability care package must be available [24]                                                                  |
| Onchocerciasis (river blindness)                                            | Caused by <i>Onchocerca volvulus</i> worm; transmission via repeated blackfly bites; results in sight impairment or permanent blindness [4]                                                            | Colombia, Ecuador, Guatemala, Mexico {4}                                                                                                                                                               | IoT: 3–5-year post-MDA surveillance, serological tests in children, < 1/1,000 prevalence of PCR-tested infected black flies [25]                                                            |
| Rabies                                                                      | Caused by rabies lyssavirus and other lyssaviruses; transmission via bites of animals, mainly dogs; results in gradual inflammation and death [4]                                                      | Mexico {1}                                                                                                                                                                                             | PHP: effective surveillance system in place, no indigenous cases detected in two consecutive years [26]                                                                                     |
| Trachoma                                                                    | Caused by <i>Chlamydia trachomatis</i> bacterium; transmission via person-to-person contact or flies; results in sight impairment or blindness [4]                                                     | Benin, Cambodia, China, Gambia, Ghana, Iran, Iraq, Laos, Malawi, Mali, Mexico, Morocco, Myanmar, Nepal, Oman, Saudi Arabia, Togo, Vanuatu {18}                                                         | PHP: prevalence of trachomatous trichiasis (blinding stage) <1 cases per 1,000 inhabitants; <5% prevalence of trachomatous inflammation-follicular stage in children within a district [27] |
| Visceral leishmaniasis (kala azar)                                          | Caused by <i>Leishmania</i> protozoans; transmission via female sandfly bites; results in hepatosplenomegaly, anaemia, fatal if untreated [4]                                                          | Bangladesh {1}                                                                                                                                                                                         | PHP: cases at <1 per 10,000 inhabitants at (sub)district level (only in Southeast Asia) [28,29]                                                                                             |
| Yaws (endemic treponematoses)                                               | Caused by <i>Treponema pallidum</i> subspecies <i>pertenue</i> bacterium; transmission via skin-to-skin contact; results in skin disfigurement [4]                                                     | India {1}                                                                                                                                                                                              | IoT: absence of new cases and transmission for three consecutive years with ongoing surveillance [30]                                                                                       |

Names and alternative names in brackets are listed for each NTD. Causative agents, modes of transmission, and disease pictures are described. Listed are names and counts of countries having achieved elimination. NTD-specific elimination criteria are detailed according to which type of elimination (PHP or IoT) has been achieved. For acronyms, see [S1 Table](#).

<https://doi.org/10.1371/journal.pntd.0013424.t001>

eight NTDs are provided in [Table 1](#). NTD control refers to reduction of incidence, prevalence, morbidity and/or mortality, while eradication, as per the WHO, is the permanent elimination of a disease without the possibility of re-emergence [4].

As seen in [Fig 2](#), 134 countries, and possibly more, remain affected by one or more of the eight NTDs. When considering the remaining 13 NTDs, this count of countries is possibly even higher. Lessons from elimination successes and failures can offer valuable insights to these countries where NTDs are still endemic. Thus, our aim is to examine the elimination approaches used in the 50 countries that have successfully eliminated at least one NTD, as well as their failed elimination attempts, and synthesise a blueprint for NTD elimination.

## Methods

### Literature search strategies and selection criteria

For each of the 50 countries, we conducted literature searches of publications detailing aspects of their NTD control and elimination strategies. Searches of published literature were conducted primarily on PubMed and secondarily on infoNTD databases between the 5th of February and 22nd of May 2024. Searches were conducted individually for each eliminated NTD, using the search terms and strategies in [Table 2](#). The search strategy format was initially piloted on PubMed, using lymphatic filariasis, the first NTD for which searches were conducted, to assess whether the strategy retrieved relevant results. The relevancy of retrieved publications was assessed by the total number of results retrieved and scanning of

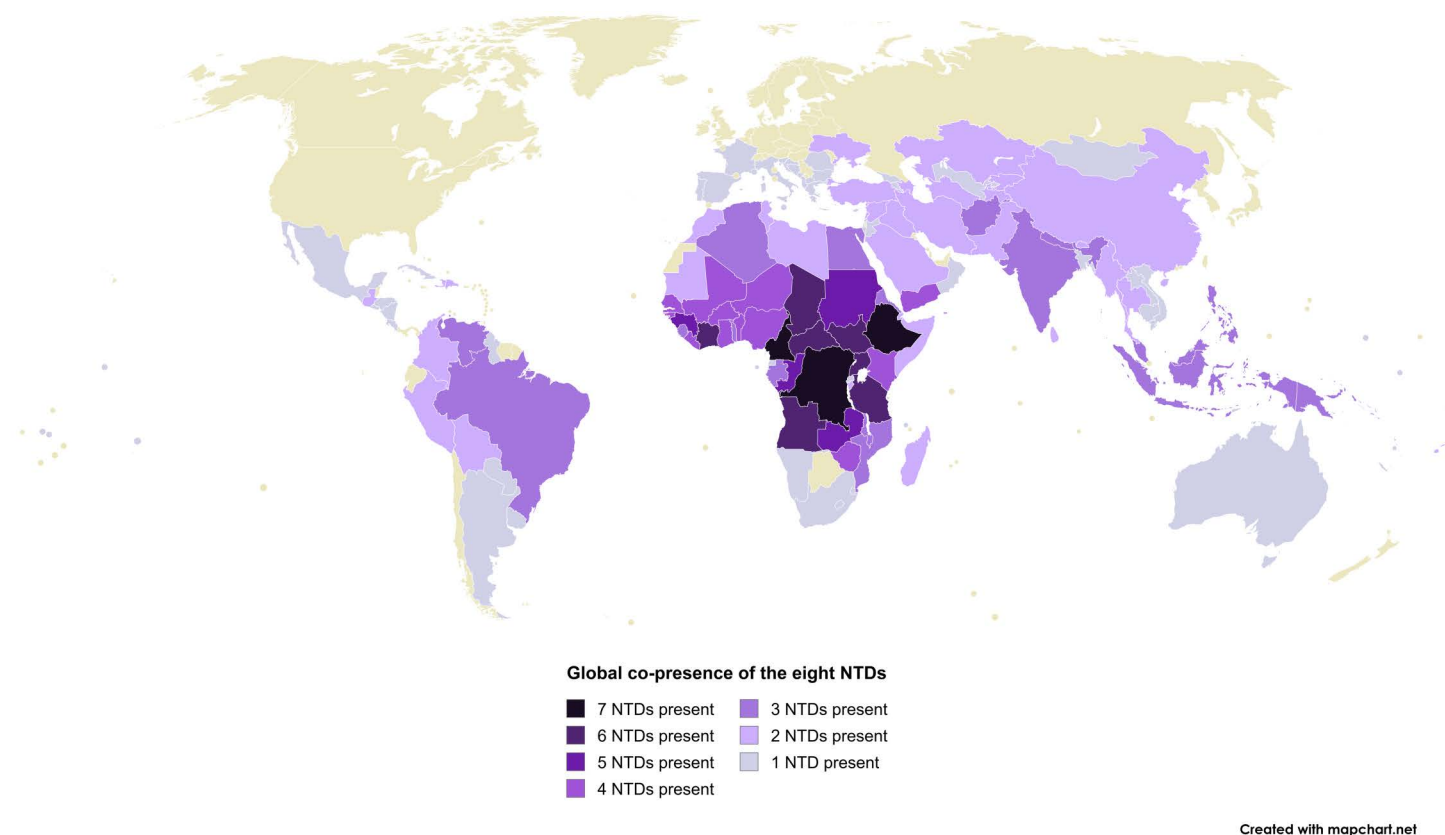

**Fig 2. Map of 134 countries with presence of one or more of the eight NTDs by October 2024. gHAT and rHAT are considered separately. With rabies, only dog-mediated human cases are considered. Produced on MapChart using the World Map: Microstates base map: <https://www.mapchart.net/detworld.html>. Terms of Use available at: [www.mapchart.net/terms.html#licensing-maps](http://www.mapchart.net/terms.html#licensing-maps). References: [32–44].**

<https://doi.org/10.1371/journal.pntd.0013424.g002>



**Table 2. PubMed search strategies used for the eight NTDs eliminated in at least one country by March 2024.**

| NTDs   | PubMed search strategies                                                                                                                                                                                                                                                                                                                                                                 | Number of PubMed results from searches |
|--------|------------------------------------------------------------------------------------------------------------------------------------------------------------------------------------------------------------------------------------------------------------------------------------------------------------------------------------------------------------------------------------------|----------------------------------------|
| GWD    | (Guinea worm disease OR dracunculiasis) AND (control OR elimination OR eradication OR surveillance) AND (Pakistan OR India OR Yemen OR Kenya OR Uganda OR Cameroon OR Nigeria OR Niger OR Benin OR Togo OR Ghana OR Côte d'Ivoire OR Senegal OR Mauritania OR Burkina Faso OR Democratic Republic of the Congo OR DRC OR Central African Republic)                                       | 343                                    |
| HAT    | (Human African trypanosomiasis gambiense OR Human African trypanosomiasis rhodesiense OR sleeping sickness) AND elimination AND (Uganda OR Rwanda OR Equatorial Guinea OR Benin OR Togo OR Ghana OR Côte d'Ivoire)                                                                                                                                                                       | 88                                     |
| LF     | (lymphatic filariasis OR elephantiasis) AND (elimination OR control OR eradication) AND (Palau OR Marshall Islands OR Kiribati OR Wallis Futuna OR Vanuatu OR Tonga OR Niue OR Cook Islands OR Thailand OR Cambodia OR Vietnam OR Viet Nam OR Laos OR Lao People's Democratic Republic OR Bangladesh OR Sri Lanka OR Maldives OR Egypt OR Yemen OR Malawi OR Togo OR Oceania OR Pacific) | 385                                    |
| ONCHO  | (Onchocerciasis OR river blindness) AND elimination AND (Mexico OR Guatemala OR Ecuador OR Colombia)                                                                                                                                                                                                                                                                                     | 66                                     |
| RABIES | Rabies AND elimination AND Mexico                                                                                                                                                                                                                                                                                                                                                        | 15                                     |
| TRA    | Trachoma AND elimination AND (Vanuatu OR Mexico OR Mali OR Gambia OR Ghana OR Togo OR Benin OR Malawi OR Morocco OR Saudi Arabia OR Iraq OR Iran OR Oman OR China OR Laos OR Lao People's Democratic Republic OR Nepal OR Myanmar OR Burma OR Cambodia)                                                                                                                                  | 166                                    |
| VL     | (Visceral leishmaniasis OR kala azar) AND elimination AND Bangladesh                                                                                                                                                                                                                                                                                                                     | 101                                    |
| YAWS   | (Yaws OR endemic treponematoses) AND elimination AND India                                                                                                                                                                                                                                                                                                                               | 7                                      |

infoNTD searches were equivalent except for being divided into separate searches for NTD common and scientific names. The most effective search strategy to obtain a reasonable number of relevant results was of the following format: (*scientific name of NTD OR common name of NTD*) AND elimination AND (*list of countries and/or regions where NTD in question has been eliminated, with alternative names of some countries*). NTD abbreviations: GWD, Guinea worm disease; HAT, human African trypanosomiasis; LF, lymphatic filariasis; ONCHO, onchocerciasis; TRA, trachoma; VL, visceral leishmaniasis.

<https://doi.org/10.1371/journal.pntd.0013424.t002>

publication titles to inspect whether most met the designated inclusion criteria. The strategy was adjusted accordingly to improve results. Search strategies only contained terminology in English. No filters were used for language or publication dates in either database. To ensure all relevant publications were identified and included, second searches and screening using the same search terms and inclusion criteria were conducted on PubMed by a second independent reviewer.

Publications to be included were required to contain information on (1) the elimination of one of the eight NTDs, (2) focus on countries or regions where elimination has been achieved, and (3) detail the elimination efforts that have led to a validated or verified elimination. Publications were excluded if they were not available in English, Spanish, or French, or if the information they provided had already been sourced from another publication or source. Beyond published literature, we searched for additional information relevant to the elimination efforts from the WHO Institutional Repository for Information Sharing (IRIS) digital library [45], the WHO Global Health Observatory [46], multi-year NTD elimination master plans of several African countries available and examined on the website of the WHO Regional Office for Africa's Expanded Special Project for Elimination of Neglected Tropical Diseases (ESPEN) [47], and from the WHO website news releases and fact sheets. These sources of information were selected based on the organisational authority, credibility and relevance of the World Health Organization. Where necessary, the following other grey literature sources were used to obtain programmatic data: Act to End NTDs West, the Carter Center, Ecuador's Ministry of Public Health, the Indian Government's Ministry of Health and Family Welfare, Saudi Arabia's Ministry of Health, the International Agency for the Prevention of Blindness, International Coalition for Trachoma Control, Liverpool School of Tropical Medicine, the Pan American Health Organization and the United States Agency for International Development. These sources were deemed reliable due to their organisational credibility, reputability, and relevance. Where possible, reliability of programmatic data provided by these sources was checked by comparing to data available from published literature. Inclusion criteria for grey literature were as for published literature: websites, documents and reports of the above organisations were included

as sources if they contained detailed information on the components of elimination efforts and programmes for one of the eight NTDs in a country or region where elimination has been validated or verified. Relevant data were located either via webpage navigation or via ChatGPT 4.0 Scholar. ChatGPT was used to discover online sources and relevant publications by prompting with requests to localise specific information and provide citations: e.g., “What year did Rwanda’s elimination programme for human African trypanosomiasis *rhodesiense* begin? Provide in-text citations.” No information or data was directly extracted from ChatGPT; citations provided by ChatGPT were used to directly navigate to the publication, website, or other source to examine and extract relevant information.

## Data extraction, synthesis and visualisation

Detailed information was extracted from the literature and additional sources. This included: (1) types of elimination achieved (PHP/loT), (2) start and validation/verification years of elimination programmes, (3) elimination interventions and strategies implemented, (4) programme structuring and degree of integration with other programmes and into the health system, (5) NTD elimination programme organisers and leaders, (6) partners involved in supporting elimination and types of support they provided, and (7) historical NTD control programme characteristics. NTD endemicity, or presence when endemicity data was not available, and country status information was used to produce Figs 1 and 2 using MapChart (mapchart.net). The identified partners contributing to elimination efforts were summarised in a bubble graph produced in PowerPoint. Synthesised summaries of elimination programme durations, integration levels, elimination strategies, and partner support types were generated using GraphPad Prism 10.2.2. The NTD elimination road map was produced in PowerPoint. The process of reviewing to synthesis is summarised Fig 3. Although a systematic search was conducted, this was not a formal systematic review or meta-analysis. Therefore, record counts were not tracked, and the flow diagram illustrates the process conceptually rather than quantitatively.

## Results

### Durations of elimination processes

Based on launch years of national elimination programmes and efforts, and years in which eliminations were validated or verified by the WHO in each country, the average elimination process durations were calculated and are shown in Fig 4. The durations for rabies, VL and yaws reflect single-country eliminations, while 95% confidence intervals are provided for NTDs eliminated in multiple countries. Elimination process durations range from 15 to 29 years, with an overall average of approximately 22 years. Notably, launch year data were unavailable for LF elimination efforts in six countries (Kiribati, Laos, Maldives, Marshall Islands, Palau, Wallis and Futuna), trachoma in six countries (Cambodia, Iran, Laos, Malawi, Saudi Arabia and Vanuatu), and rHAT in Rwanda, so these were excluded from Fig 4.

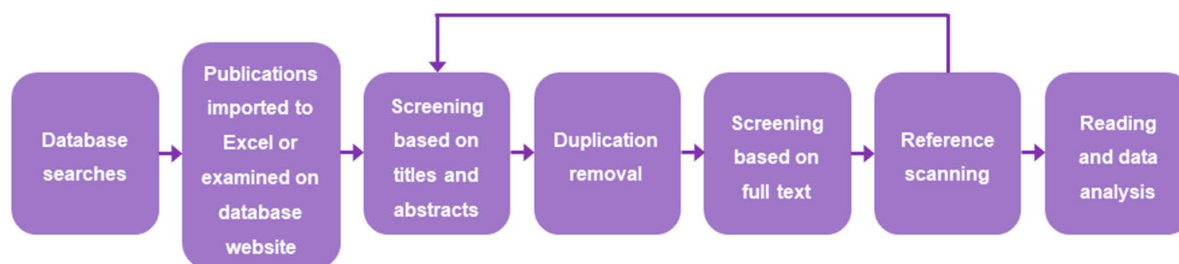

**Fig 3. Flow chart depicting the literature search, publication inclusion and reading process.** PubMed search results were downloaded as Excel files, while infoNTD results were examined on website. Reference scanning refers to discovery of relevant publications from the references of publications already included from literature searches. This figure was produced in PowerPoint.

<https://doi.org/10.1371/journal.pntd.0013424.g003>

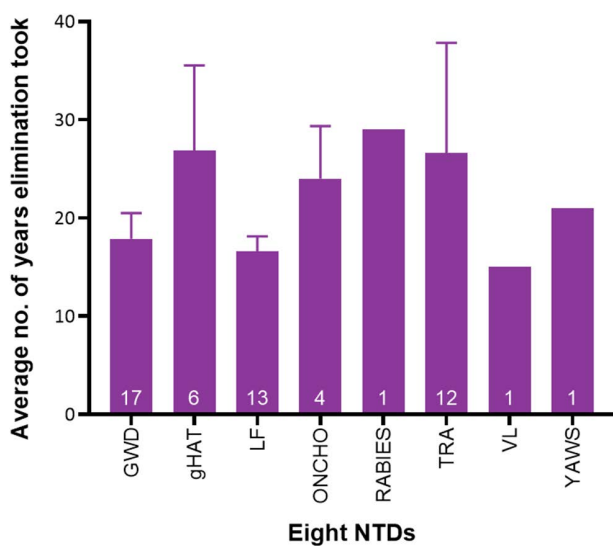

**Fig 4. Average duration of the NTD elimination process for the eight NTDs whose elimination has been achieved in at least one country.** Sample sizes, i.e., number of countries with elimination programmes for which information was found, are denoted inside bars for each set of data. Data sources: GWD: [19,48–71]; HAT: [48–50,72–75]; LF: [50,76–93]; Onchocerciasis: [94–99]; Rabies: [100]; Trachoma: [19,50,101–115]; VL: [116,117]; Yaws: [118,119].

<https://doi.org/10.1371/journal.pntd.0013424.g004>

## NTD control strategies employed in elimination programmes

**Grouping of interventions into strategy categories.** The common elimination interventions and strategies which were employed across the eight NTDs and consistently appeared in literature and other sources were recorded. Interventions refer to individual actions which accelerate elimination, while strategies encompass a range of interventions. The common interventions are grouped into eight strategy categories detailed in Table 3. Four of these strategies are preventive chemotherapy (PC), water, sanitation and hygiene (WASH), vector control, and veterinary public health, as recommended by the WHO for NTD prevention, control, elimination, and eradication [120]. We grouped the other reported interventions into case detection and disease monitoring, case management, health system capacity building and strengthening, and community engagement and education (Table 3). Additionally, the WHO-endorsed SAFE strategy (Surgery, Antibiotics, Facial cleanliness and Environmental improvements) employed for trachoma [4,103] has been divided into its four components. These components have been allocated across three of the eight strategies used in this review (Table 3).

**Programmatic employment of elimination strategies across NTDs.** The review showed that different strategy combinations were used for the different NTDs (Fig 5). While some strategies such as case management were used across most NTDs, others such as veterinary public health were related to the mode of transmission. Detailed information on the employment and components of the eight strategies is provided in S2 Table.

Case detection and disease monitoring was the most frequently used strategy, employed in 63 programmes across all eight NTDs in the 50 countries. The lack of concordance between the number of programmes and countries is a result of some countries having multiple NTD programmes. Case management was used in 48 programmes, for all NTDs excluding onchocerciasis, while health system capacity building and strengthening was implemented in 46 programmes for all NTDs except rabies. Community engagement and education was utilised in 43 programmes, excluding gHAT. PC was employed in 37 programmes targeting trachoma, LF, onchocerciasis, and yaws. To date, no country has been verified for the elimination of the fifth PC NTD, schistosomiasis. WASH has been applied in 31 programmes against GWD and trachoma. Vector control targeting Guinea worm



**Table 3. The eight NTD elimination strategies as defined in this report, alongside their definitions and individual interventions included in each strategy.**

| NTD elimination strategies                        | Definitions of strategies                                                                                                                            | Interventions included in strategies                                                                                                                                                                                                                                                         |                                                                                                                                                                                                                                                                                                                                                                                                                     |
|---------------------------------------------------|------------------------------------------------------------------------------------------------------------------------------------------------------|----------------------------------------------------------------------------------------------------------------------------------------------------------------------------------------------------------------------------------------------------------------------------------------------|---------------------------------------------------------------------------------------------------------------------------------------------------------------------------------------------------------------------------------------------------------------------------------------------------------------------------------------------------------------------------------------------------------------------|
| Case detection and disease monitoring             | Detection and diagnosis of individual cases, and monitoring disease incidence, prevalence, and geographical spread                                   | <ul style="list-style-type: none"> <li>Prevalence mapping (questionnaires, surveying, historical records)</li> <li>Screenings</li> <li>Surveillance (active and passive, post-MDA)</li> </ul>                                                                                                | <ul style="list-style-type: none"> <li>Entomological surveying</li> <li>Active case searches</li> <li>Investigating rumoured cases</li> <li>Case reporting and recording</li> </ul>                                                                                                                                                                                                                                 |
| Case management                                   | Action taken to manage individual diagnosed cases, and prevent onwards transmission, morbidity, disability, and death                                | <ul style="list-style-type: none"> <li>Appropriate medical attention</li> <li>Component S of SAFE strategy (Surgery)</li> <li>Case containment</li> <li>Case containment centres</li> </ul>                                                                                                  | <ul style="list-style-type: none"> <li>Morbidity management and disability prevention (MMDP) (including hydrocoele surgeries, morbidity management kits)</li> <li>PEP for dog-bitten people</li> </ul>                                                                                                                                                                                                              |
| Health system capacity building and strengthening | Development and enhancement of country's ability to conduct elimination efforts, and strengthening elimination programmes                            | <ul style="list-style-type: none"> <li>Training of medical professionals/health workers/ field workers/volunteers</li> <li>Monitoring and evaluation of elimination programme performance</li> <li>KAP surveys</li> <li>Innovative employment of technologies (e.g., SMS systems)</li> </ul> | <ul style="list-style-type: none"> <li>Replacement of poorly performing health workers or volunteers</li> <li>Research (operational, clinical)</li> <li>Integration (with other interventions, elimination programmes, or into primary health care system)</li> <li>Advocacy</li> <li>Involvement of local women in elimination efforts</li> <li>Motivation incentives for volunteers and health workers</li> </ul> |
| Community engagement and education                | Involvement of affected communities in elimination efforts, and enhancing their knowledge of NTDs and their elimination                              | <ul style="list-style-type: none"> <li>Social mobilisation and sensitisation</li> <li>Health education</li> <li>MDA awareness campaigns</li> <li>Advertisement campaigns</li> </ul>                                                                                                          | <ul style="list-style-type: none"> <li>IEC and COMBI campaigns</li> <li>Education on correct use of water filters</li> <li>Education on safety of interventions (e.g., ABATE)</li> <li>Cash rewards for case reporting</li> </ul>                                                                                                                                                                                   |
| Preventive chemotherapy                           | Mass drug administration to eligible members of communities in endemic or at-risk areas to prevent and treat cases [4,121], accompanied by surveying | <ul style="list-style-type: none"> <li>Mass drug administration (MDA)</li> <li>Component A of SAFE strategy (Antibiotics)</li> <li>Preventive treatment of infected person's contacts</li> </ul>                                                                                             | <ul style="list-style-type: none"> <li>MDA-related surveys (coverage and impact surveys, TAS, stop- and pre-stop-MDA surveys, post-MDA surveys)</li> </ul>                                                                                                                                                                                                                                                          |
| WASH (water, sanitation and hygiene)              | Ensuring and improving access to safe water, sanitation and hygiene [4,122]                                                                          | <ul style="list-style-type: none"> <li>Improving safe water access/ supply/ provision</li> <li>Building and rehabilitating wells and other safe water sources</li> </ul>                                                                                                                     | <ul style="list-style-type: none"> <li>Use of water filters</li> <li>Advocacy with water organisations</li> <li>Components F and E of SAFE strategy (Facial cleanliness, Environmental improvements)</li> </ul>                                                                                                                                                                                                     |
| Vector control                                    | Action to diminish vector population densities to reduce NTD transmission [123]                                                                      | <ul style="list-style-type: none"> <li>Stagnant water source treatments with larvicide (ABATE)</li> <li>Insect traps (e.g., Tiny Targets)</li> </ul>                                                                                                                                         | <ul style="list-style-type: none"> <li>Vector control as part of malaria/dengue programmes (LLINs)</li> <li>Integrated vector management (IVM)</li> </ul>                                                                                                                                                                                                                                                           |
| Veterinary public health                          | Diminishing animal reservoir to reduce transmission to humans [124]                                                                                  | <ul style="list-style-type: none"> <li>Animal trypanosomiasis diagnosis and treatment</li> </ul>                                                                                                                                                                                             | <ul style="list-style-type: none"> <li>Annual mass dog vaccination campaigns</li> <li>Cat and dog sterilisation</li> </ul>                                                                                                                                                                                                                                                                                          |

References within definition boxes are to the model WHO strategies, which may be slightly modified here for the purposes of this review. Only the interventions listed in this table are considered in this report. For acronyms and abbreviations used, see [S1 Table](#). References: [48–60,62,64,66–68,73,76–91,94–97,99–113,116–118,125–179].

<https://doi.org/10.1371/journal.pntd.0013424.t003>

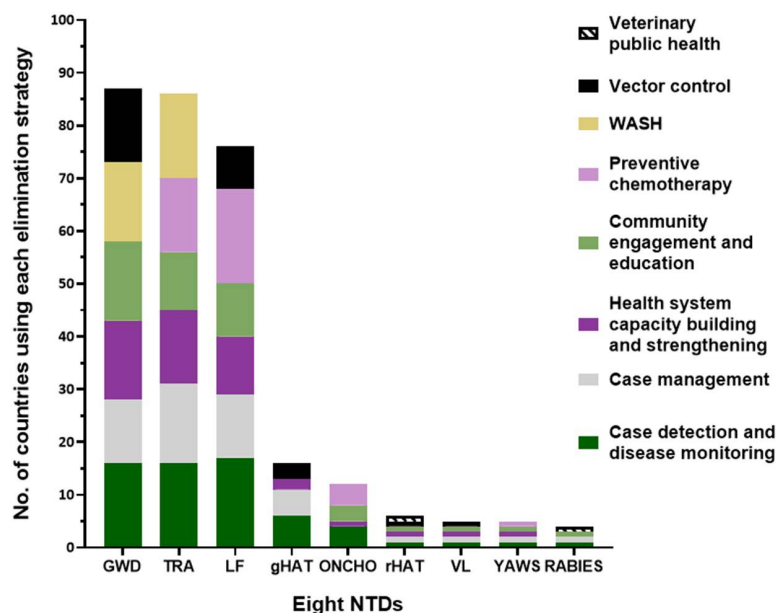

**Fig 5. Elimination strategies employed across the eight NTDs in the 50 countries having achieved elimination.** On the x-axis are the eight NTDs, with gHAT and rHAT presented separately. On the y-axis are numbers of countries which have employed each strategy per NTD. Each section of a stacked bar therefore represents the number of countries whose elimination programmes or efforts have employed the strategy for the NTD in question. A point system was used to generate this graph: each strategy was given a point per NTD each time at least one intervention included in this strategy was used in an elimination programme or line of efforts for the NTD in question. References: [48–60,62,64,66–68,73,76–91,94–97,99–113,116–118,125–182].

<https://doi.org/10.1371/journal.pntd.0013424.g005>

larvae-harboring copepods, mosquitoes, tsetse flies, or sandflies was utilised in 27 programmes for GWD, LF, HAT, and VL. Veterinary public health approaches, such as vaccination of dogs which are rabies reservoirs, and diagnosis and treatment of trypanosome-infected livestock, have been used in two elimination programmes, those of Mexico for rabies and Rwanda for rHAT [100,146,160,162].

### Elimination programme structure and integration

Iran and Saudi Arabia were the only countries to eliminate an NTD (trachoma) without dedicated elimination programmes or specific efforts. Instead, they relied on primary health care (PHC) services and the general implementation of the WASH strategy [105,125]. In contrast, all other countries ran dedicated single or multi-disease-specific NTD elimination programmes or conducted dedicated efforts, even if not formally organised as official national elimination programmes [48–60,62,64,66–68,73,76–91,94–97,99–113,116–118,125–179].

Fig 6 shows the varied levels of integration of NTD control and elimination efforts into programmes targeting multiple NTDs or other diseases, or the mainstreaming of elimination programmes into national health systems and activities. Overall, 39 elimination programmes across NTDs were non-integrated stand-alone programmes targeting one NTD only at a time. Five programmes across LF and GWD had partial integration with other NTDs or malaria. These programmes had stand-alone structures yet integrated some interventions, such as vector control, MDA, or active case searches, with other NTDs or malaria. Three programmes across LF and trachoma were fully integrated NTD programmes, meaning they combined efforts against two or more NTDs. 10 integrated programmes across LF, trachoma and GWD targeted one or more NTDs along with other diseases and conditions. Some of these programmes employed cross-cutting strategies like WASH, and seven targeted trachoma through general agendas for eye health, blindness prevention, or communicable

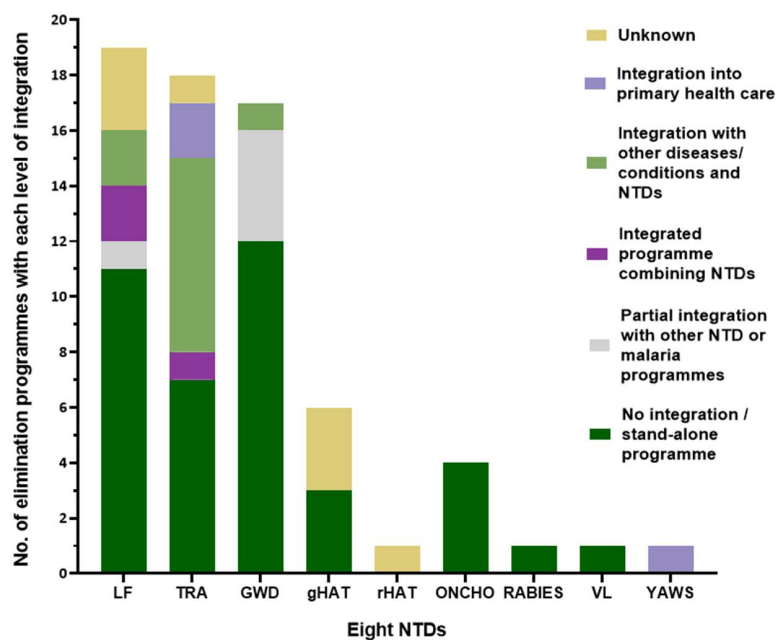

**Fig 6. Levels of integration in elimination of the eight NTDs.** On the x-axis are the eight NTDs, with gHAT and rHAT presented separately. On the y-axis are numbers of countries which have eliminated each NTD. Each section of a stacked bar represents the number of countries that have eliminated an NTD using a programme or line of effort with the colour-denoted level of integration. When sources discussed disease-specific programmes without mention of integration into primary healthcare or shared efforts, these programmes have been assumed to be stand-alone.

<https://doi.org/10.1371/journal.pntd.0013424.g006>

diseases [101,105,107,111,113,164,172,183,184]. India had a dedicated yaws programme which was delivered through existing health systems in place [118,178]. For eight programmes and lines of effort across LF, trachoma and HAT, information on the level of integration was not found or was unclear.

## Operational aspects

**Organisers of elimination programmes and efforts.** We found that both local governments and international development partners have been involved in facilitating NTD elimination. In most countries, national Ministries of Health (MoH) and similar institutions have been organisers of elimination efforts, and particularly in African countries have developed and subsequently implemented master plans for NTD control and elimination. National universities, institutes, councils, and government ministries outside of the MoHs have been involved in supporting the delivery of elimination programmes and efforts. In Iraq and Nepal, for example, Ministries of Health collaborated with respective Ministries of Education to organise trachoma screenings in school-aged children (Iraq) and integrate trachoma modules into the school curriculum (Nepal) [106,112].

**Partners supporting NTD elimination.** International organisations have supported several elimination programmes. In Fig 7 and Table 4, we summarise the partners which supported three or more elimination programmes across the eight NTDs eliminated in at least one country to date. Partners that have supported one or two elimination programmes are listed in S3 Table. The WHO has supported the largest number of countries, 47, with the Carter Center and UNICEF supporting 21 and 11 countries, respectively. In addition to partners shown in Fig 7, Uniting to Combat NTDs, a global NTD advocacy and resource mobilisation organisation, has contributed to NTD elimination efforts by building political willpower and mobilising financial resources through the 2012 London Declaration on NTDs [185], and its successor, the 2022 Kigali Declaration [186].

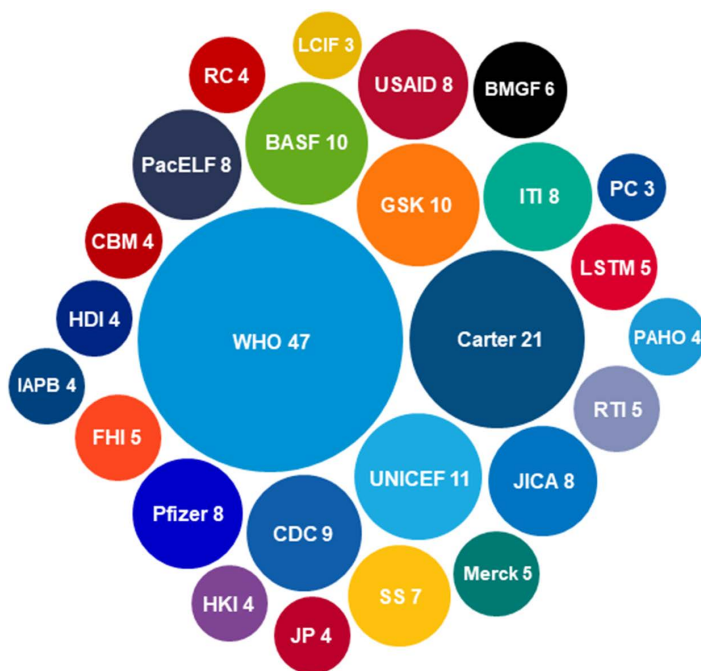

**Fig 7. Partners supporting three or more NTD elimination programmes and efforts across the eight NTDs.** For definitions of partner name abbreviations and acronyms, see [Table 4](#). Size of each bubble, and the number shown after the partner name/acronym, correspond to number of individual elimination programmes and efforts supported by each partner. A point system was used to generate the graph: a partner was given a point for each individual NTD elimination programme or line of efforts it has supported. Each partner could only be given one point for each individual programme it supported: extent or type of support was not considered. Data used to generate this graph was gathered from 63 NTD-country combinations for which information was found. References: [48–56,59–66,69,72,75–81,84,86–89,91,94,96–98,101–104,106,108–113,116,117,126,129,133–137,140,145,146,148,152,157,158,162,168–170,172–174,177,178,184,187–203].

<https://doi.org/10.1371/journal.pntd.0013424.g007>

**Types of support provided by partners.** The types of support provided by partners who supported at least three programmes (see [Fig 7](#)) are summarised in [Fig 8](#). Details and examples of support provided by these partners are available in [S4a](#) and [S4b Table](#). Types of support include financial assistance to cover the partial or whole costs of running elimination programmes, and delivering interventions such as MDA. Technical support involved control strategy and NTD master plan development, protocols, and expert guidance. Financial and technical support also included capacity building in the form of staff training and infrastructure strengthening. Operational support towards programme implementation included activities such as procurement of drugs and diagnostic kits, and assistance with carrying out of interventions in the field. PC drugs were donated by pharmaceutical companies, with the donations being managed by non-pharmaceutical organisations including the WHO. Advocacy efforts promoted elimination, mobilised resources, and facilitated regional initiatives. Unspecified support refers to cases where the type of assistance was not detailed. Most of the NTD elimination programmes received most forms of support to varying levels, except for rabies possibly due to it not being a PC NTD.

## Challenges to elimination

In addition to the cornerstones of success detailed above, our review also included investigating historical failures in elimination. These are summarised in [Table 5](#). Analyses of 11 failed elimination efforts revealed that although the programmes failed to eliminate the NTDs, seven of these did succeed in reducing infection levels ([Table 5](#)). Also, efforts against HAT (in several African countries) [142], VL (Bangladesh) [204], and yaws (India) [118] came close to elimination. Nonetheless,

**Table 4. Full names of partners having supported three or more NTD elimination programmes (shown in Fig 7).**

| Partner name abbreviation/ acronym | Partner name definition                                           |
|------------------------------------|-------------------------------------------------------------------|
| BMGF                               | Bill and Melinda Gates Foundation                                 |
| Carter                             | the Carter Center                                                 |
| CBM                                | Christian Blind Mission                                           |
| CDC                                | Centers for Disease Control and Prevention (US)                   |
| FHI                                | FHI 360                                                           |
| GSK                                | GlaxoSmithKline                                                   |
| HDI                                | Health & Development International                                |
| HKI                                | Helen Keller International                                        |
| IAPB                               | the International Agency for the Prevention of Blindness          |
| ITI                                | International Trachoma Initiative                                 |
| JICA                               | Japan International Cooperation Agency                            |
| JP                                 | Japanese government                                               |
| LCIF                               | Lions Clubs International Foundation                              |
| LSTM                               | Liverpool School of Tropical Medicine                             |
| PacELF                             | the Pacific Programme for the Elimination of Lymphatic Filariasis |
| PAHO                               | Pan American Health Organization                                  |
| PC                                 | Peace Corps                                                       |
| RC                                 | Red Cross                                                         |
| RTI                                | RTI International                                                 |
| SS                                 | Sightsavers                                                       |
| UNICEF                             | the United Nations International Children's Emergency Fund        |
| USAID                              | United States Agency for International Development                |
| WHO                                | World Health Organization                                         |

<https://doi.org/10.1371/journal.pntd.0013424.t004>

case resurgences, insufficient case decreases, and delayed progress hindered elimination. Other reasons for elimination failure were resource limitation, insufficient intensity in carrying out interventions, lack of effective interventions, socio-political changes, deprioritisation, as well as instability and conflicts. Notable is that these reasons for failure are intertwined. [S5 Table](#) provides more detailed aspects of some of the historical failed programmes.

## Road map for NTD elimination

Based on the findings of this review, a road map detailing the blueprint for NTD elimination has been compiled ([Fig 9](#)). For ongoing and future NTD elimination programmes to be successful, they must incorporate country ownership, sustained commitment, dedicated and cross-cutting strategies, integration, One Health approaches, stakeholder support, health diplomacy, and lessons from historical failures.

## Discussion

Neglected tropical diseases are compromising progress towards targets of several poverty, health, and education SDGs [\[4,8,9\]](#). Thus, the WHO has set a target for 100 countries to eliminate at least one NTD by 2030 [\[4\]](#). By March 2024, 50 countries had achieved this goal, and by June 2025, this number had risen to 56 countries [\[18\]](#). To meet the WHO's target, 44



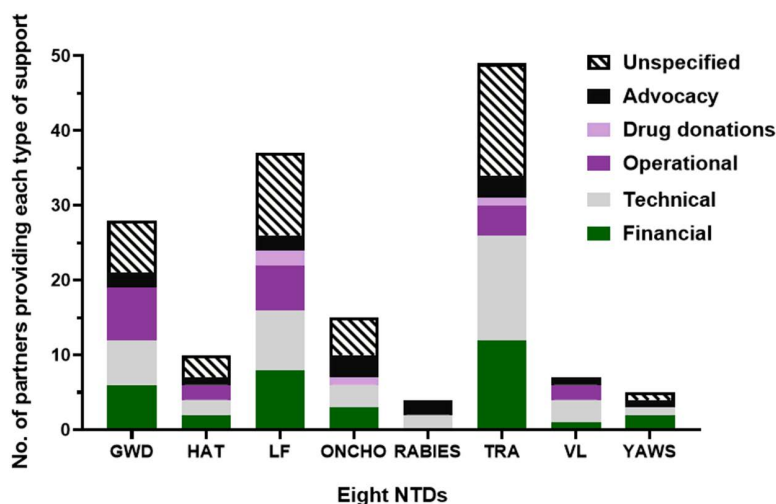

**Fig 8. Types of support provided by partners contributing to the elimination of the eight NTDs at any point or for any duration of time during the elimination process.** On the x-axis are the eight NTDs. On the y-axis are numbers of partners which have provided each type of support. Each section of a stacked bar represents the number of partners that have provided the colour-designated type of support to aid elimination of each NTD. A point system was used to generate this graph: a partner was given a point for each type of support per NTD when it had provided this for at least one relevant programme.

<https://doi.org/10.1371/journal.pntd.0013424.g008>

more countries must eliminate an NTD by 2030, highlighting the need to both accelerate and intensify elimination efforts. In this work, we analysed the features of NTD programmes in the 50 countries associated with successful elimination by March 2024 and their historical elimination failures to produce a blueprint that can inform programmes in other countries.

A significant feature of NTD elimination across all 50 countries was the time taken to reach elimination. The average duration of successful NTD elimination processes was over two decades [19,48–119], underscoring the need for sustained time commitment, investment, systematic interventions, and political will and prioritisation. This is underlined by experiences from historical elimination efforts in, for example, Uganda and India, where lack of long-term investment and sustained control efforts led to resurgences of HAT and yaws, respectively [118,142,178,205,206]. The maintenance of realistic time frames for long elimination processes can help ensure efficient planning, resource allocation and sustained motivation. It also helps reduce the possibility of donor hesitancy or withdrawal [208]. Long time spans also require NTD programmes to be resilient to endure potential disruptions such as conflict, economic and political shifts, or changing/sudden pressures on health systems such as those seen during the COVID-19 pandemic [209]. All of these aspects are particularly important for the last mile efforts against NTDs like GWD and yaws, both targeted for eradication [4,210].

Failed historical NTD programmes and efforts provide useful lessons to apply in today's efforts to eliminate more NTDs in more countries. Firstly, there must be no room for complacency to stand in the way of elimination. Political prioritisation of elimination must be upheld throughout, and efforts sustained all the way to elimination and beyond to prevent NTD pre- or post-elimination resurgence. Since country elimination statuses are reversible, it is imperative that countries sustain post-elimination interventions such as surveillance to not lose or undo progress, as recommended by the WHO [31,208]. Countries should receive standardised guidance on post-elimination activities [108], and elimination efforts must be supported with adequate resources and efficient interventions over long timeframes. The existence and development of effective interventions, drugs, supplies, and technologies to beat NTDs is integral.

Another key finding was that countries successful in NTD elimination had ownership of their programmes and dedicated elimination initiatives [48–56,59–66,69,72,75–81,84,86–89,91,94,96–98,101–104,106,108–113,116,117,126,129,133–137,140,145,146,148,152,157,158,162,168–170,172–174,177,178,184,187–202]. For example, the Ugandan government's strong

Table 5. Characteristics of historical NTD control and elimination programmes, campaigns, and efforts which failed to achieve WHO-validated or -verified NTD elimination status.

| NTD          | Country           | Historical control/elimination efforts                                                                                                                                                            | Lowered case numbers? | End point                      | Causes of resurgence and/or delay in elimination |                                         |                                 |                                                 |                                          | Ref.          |
|--------------|-------------------|---------------------------------------------------------------------------------------------------------------------------------------------------------------------------------------------------|-----------------------|--------------------------------|--------------------------------------------------|-----------------------------------------|---------------------------------|-------------------------------------------------|------------------------------------------|---------------|
|              |                   |                                                                                                                                                                                                   |                       |                                | Lack of funds/capacity/resources/staff/time      | Insufficient intensity of interventions | Lack of effective interventions | Socio-political changes, instability, conflicts | Lack of prioritisation/de-prioritisation |               |
| HAT          | Uganda            | Wide-scale screening and treatment campaigns                                                                                                                                                      | Yes                   | Resurgence                     |                                                  |                                         |                                 | ✓                                               | ✓                                        | [142,205,206] |
| HAT          | Equatorial Guinea | Screenings, requirement of health passport for travelling, proof of screening participation for employment                                                                                        | Yes                   | Resurgence                     | ✓                                                |                                         |                                 | ✓                                               | ✓                                        | [73]          |
| LF           | Egypt             | Endemicity surveys, selective DEC case treatment, intensive vector control                                                                                                                        | Yes                   | Resurgence                     | ✓                                                | ✓                                       |                                 |                                                 |                                          | [79]          |
| LF           | Maldives          | Prevalence surveys, selective DEC case treatment, vector control                                                                                                                                  | Yes                   | Unknown                        |                                                  | ✓                                       | ✓                               |                                                 |                                          | [154]         |
| ONCHO        | Mexico            | Nodules, selective DEC case treatment, sporadic vector control (DDT)                                                                                                                              | Unknown               | Unknown                        |                                                  | ✓                                       | ✓                               |                                                 |                                          | [96,97,159]   |
| ONCHO        | Ecuador           | Systematic nodules, selective DEC case treatment, sporadic vector control (DDT)                                                                                                                   | No                    | Unknown                        |                                                  | ✓                                       | ✓                               |                                                 |                                          | [99]          |
| ONCHO        | Guatemala         | Nodules, selective DEC case treatment, sporadic vector control (DDT)                                                                                                                              | Unknown               | Unknown                        |                                                  | ✓                                       | ✓                               |                                                 |                                          | [95,98]       |
| RABIES       | Mexico            | Wide-scale dog vaccinations 1970s-1980s                                                                                                                                                           | No                    | Cases not sufficiently lowered |                                                  | ✓                                       |                                 |                                                 | ✓                                        | [160,207]     |
| TRA          | Mexico            | Case surveillance, hygiene promotion, use of antiseptics, antibiotics, surgeries, building of hospitals and health centres, health brigades did case detection and reporting, health examinations | Yes                   | Unknown                        | ✓                                                | ✓                                       |                                 |                                                 | ✓                                        | [96,108]      |
| Malaria (VL) | Bangladesh        | Collateral sandfly control via malaria eradication programme 1950s-1970s (IRS with DDT)                                                                                                           | Yes                   | Resurgence                     |                                                  | ✓                                       | ✓                               |                                                 |                                          | [176,177,204] |
| YAWS         | India             | Arsenicals used 1935-1946. In 1952, a control programme used penicillin for treatment                                                                                                             | Yes                   | Resurgence/ re-emergence       | ✓                                                | ✓                                       |                                 |                                                 | ✓                                        | [118,178]     |

Interventions conducted against NTDs in listed countries are summarised. The endpoint results, whether case numbers were decreased, and overall reasons for programme failure are denoted. For acronyms, see [S1 Table](#). NTD abbreviations: HAT, human African trypanosomiasis; LF, lymphatic filariasis; ONCHO, onchocerciasis; TRA, trachoma; VL, visceral leishmaniasis.

<https://doi.org/10.1371/journal.pntd.0013424.t005>

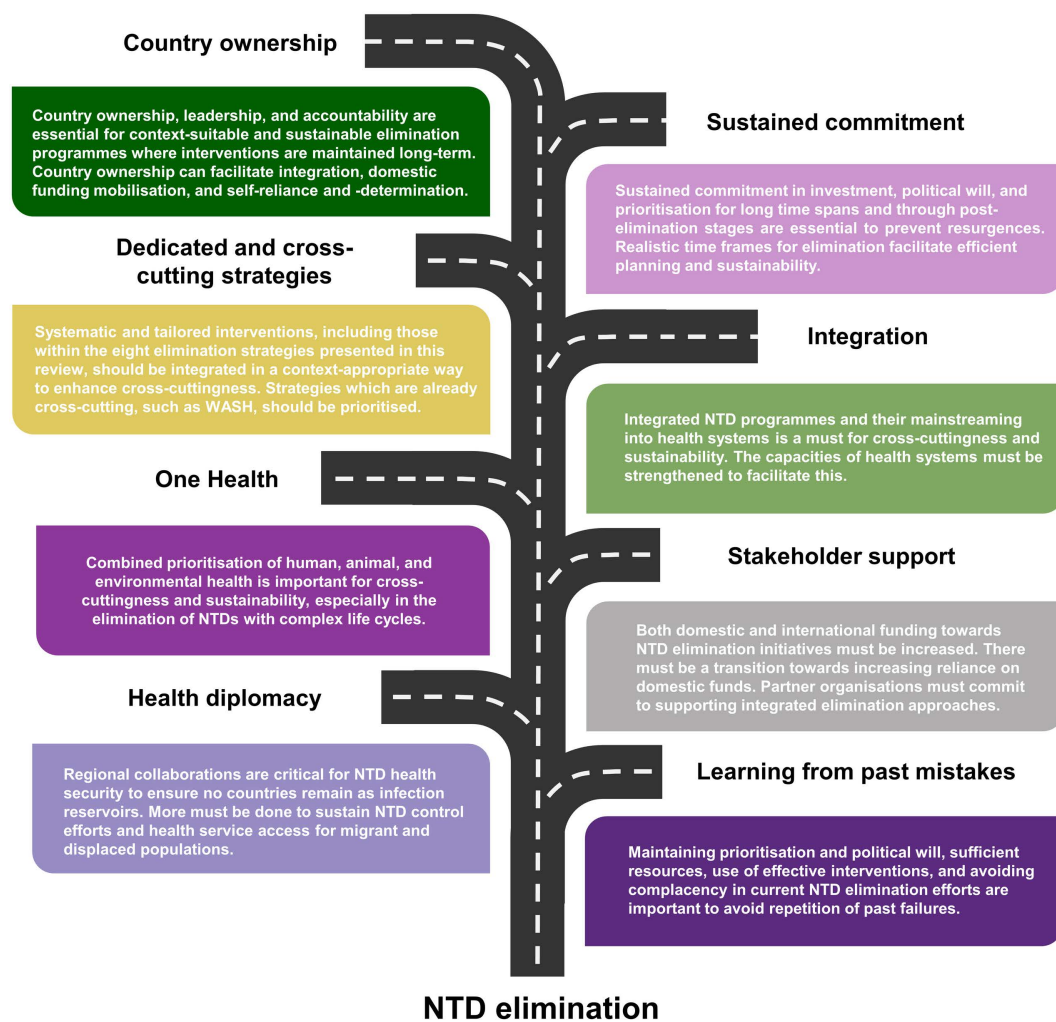

**Fig 9. Road map for NTD elimination based on the findings of this review.** This figure was produced in PowerPoint.

<https://doi.org/10.1371/journal.pntd.0013424.g009>

leadership in efforts against GWD [59], Niue's government's stable support for LF elimination [81], and the Chinese government's commitment to trachoma prioritisation [167] have been cornerstones of these countries' successes in eliminating these diseases. Indeed, country ownership is essential for context-suitable elimination structuring, and its importance is emphasised in the Kigali Declaration of 2022 [9]. In the WHO's NTD road map for 2021–2030, Pillar 3 focuses on changing operating models and culture to facilitate country ownership of NTD control programmes [4]. This is a critical step for community buy-in and uptake as well as long-term sustainability as highlighted before. Government commitment to and accountability over elimination efforts can ensure their maintenance pre- and post-elimination and facilitate NTD programme integration into national health systems [211]. Domestic political will can allow domestic funding mobilisation and funnelling to elimination efforts [211], thereby enhancing country self-determination and reducing reliance on external funding.

Support of various partners external to national MoHs has also been key in NTD elimination. Support provided by partners has included financial, technical and operational support, capacity building, drug donations, and advocacy [48–56,59–66,69,72,75–81,84,86–89,91,94,96–98,101–104,106,108–113,116,117,126,129,133–137,140,145,146,148,152,157,158,162,168–170,172–174,177,178,184,187–202]. Each type of support has mostly been provided by more than one partner, ensuring availability

of complementary and interdisciplinary support. This is crucial for a One Health approach which harnesses transdisciplinary collaboration between stakeholders [11]. Cooperation between partners, as practised by, e.g., WHO and ITI with pharmaceutical companies (S4a and S4b Table), is also important to ensure resource optimisation. As suggested by the heavy involvement of partners, successful elimination has at least in some cases been dependent on external financial support [50,208,212], particularly as the eight NTDs mostly affect lower-income countries [213]. This has been the case for, e.g., Togo's HAT and LF elimination programmes which relied entirely on funding from partners (S4a and S4b Table) [50]. Other countries, on the other hand, have entirely or mostly funded their elimination efforts domestically; examples include the Mexican government's onchocerciasis MDA programme [97] and India's yaws programme [178].

To facilitate continued global progress against NTDs, both domestic and international funding of NTD elimination efforts should be increased. Cost estimates for some NTD elimination programmes are available: Uganda's GWD elimination programme was estimated to cost 5.6 million US dollars [59], while Mexico's onchocerciasis programme cost 57.5 million US dollars [96]. Significant investment is therefore needed, particularly as last-mile elimination interventions may have reduced cost-effectiveness or higher costs [20,214].

Despite the benefits and essentiality of partnerships for NTD control and elimination, heavy reliance on external funding is not without limitations. Partner support may compromise domestic leadership and self-determination, and be unpredictable and limited in duration or be withdrawn completely in the face of conflicts, political instability, geopolitical changes, or shifts in donor country political priorities [107,215]. This has been seen most recently with the foreign aid cuts by the United States and United Kingdom [216,217]. Over-reliance on external funding can thus render NTD programmes fragile and undermine their resilience [218]. Heavy partner involvement may also hinder integration as, for varied reasons, donors may prefer to fund stand-alone elimination programmes over integrated ones [50,168,208,215,219,220]. This can also compromise equal distribution of resources across NTDs [214]. Countries must therefore organise alternative funding routes, generate national budgets for elimination plans, strive for developing and prioritising domestic funding channels [221], and explore innovative funding mechanisms [222]. Collaboration is required from countries and partners to orchestrate a gradual transition in funding NTD elimination increasingly from domestic funds and less from international partners, all the while carefully maintaining capacity that has been built [223]. Partner organisations must ensure their operations support integrated NTD elimination models and direct investments towards integrated, cross-cutting approaches, particularly prioritising One Health [11,223].

This review identified eight key strategies which have been employed in combinations across NTDs to achieve elimination (Fig 5). We recommend that, to maximise impact and use of resources, countries integrate these strategies in a co-endemicity-dependent and context-appropriate way to generate cross-cutting approaches to progress towards the WHO-set 2030 goals [219]. For example, various African and South American countries affected by LF, onchocerciasis, and trachoma might employ integrated PC to target these diseases together [39,42,43]. Some of the eight strategies identified are already cross-cutting. For example, health system capacity building and strengthening, whether in the form of infrastructure, expertise, or facilities, can generally support the fight against NTDs and other diseases, and over time diminish the need for partner support [224]. The WASH strategy, providing access to safe water, sanitation and hygiene, can contribute to improving population health by reducing transmission of NTDs and waterborne and communicable diseases which thrive in poor hygiene and sanitation conditions [122,225]. Safe water access is also necessary for the management of NTD morbidities. Integrated vector control strategies, on the other hand, can simultaneously target insects, snails, and water fleas, which act as transmitting vectors or intermediate hosts for at least 12 different NTDs [4,123]. Veterinary public health promotes animal health in support of human health to control zoonotic NTDs like rabies.

These cross-cutting strategies align with the One Health approach which is crucial for sustainable NTD control and elimination as it considers the interdependency between human, animal and ecosystem health [11,226]. Indeed, NTD control and elimination strategies are ultimately not sustainable if they only account for the human components of NTD transmission cycles. For example, effective rabies control relies on systematically vaccinating dogs as this is the most

sustainable and cost-effective way to prevent rabies deaths in humans [11]. A One Health systems thinking approach also allows for consideration of various underlying factors and root causes maintaining and exacerbating NTD burdens, including poverty and economic barriers, environmental factors, social inequalities, and climate change [11]. Consideration of these factors will allow for more effective dismantling of NTD burdens by tackling their upstream drivers [11,227]. Although a cross-cutting One Health framework is vital for long-term, sustainable control of all NTDs, it is particularly necessary for NTDs like schistosomiasis that have complex life cycles involving, e.g., several hosts and environmental contamination. Indeed, biological characteristics of NTDs may ease or hinder elimination processes. The to-date successful eliminations of, e.g., GWD, gHAT, LF, onchocerciasis, and trachoma in four or more countries each have likely been partly facilitated by their biological characteristics favourable to elimination. These characteristics include humans being principal definitive hosts or reservoir, limited spill-over from animal reservoirs in the case of GWD, and lack of a vector in the case of trachoma.

Most successful elimination efforts targeted a single NTD at a time through dedicated programmes, while fewer integrated NTD efforts to various levels in their programmes. Crucially, the WHO's 2021–2030 NTD road map encourages a shift from these stand-alone programmes towards integrated ones [4]. The transition from parallel vertical programmes towards programmes targeting multiple NTDs and/or other diseases would foster the employment of cross-cutting approaches which offer several benefits, including greater cost-effectiveness, resource optimisation, and minimising duplication of effort, all key considerations particularly in low-resource settings [219,228]. Thus, far some successful elimination programmes, including those of several African and Asian countries for trachoma [101,111,164,172], had integrated programmes targeting NTDs alongside other diseases or conditions such as malaria or causes of blindness. Togo, the country which has thus far eliminated the highest number of NTDs per country (four), has likely been so successful in NTD elimination thanks to its adoption of integrated activities against NTDs like LF and trachoma [50].

Mainstreaming NTD control and elimination into the health system, particularly integration into the PHC, has the potential to accelerate efforts. Already 16 African countries have developed NTD master plans which target various NTDs and identify integration opportunities [48–50,54,56,61,65,69,70,72,75,130,145,168,183,184,229]. Moving away from fragmented and siloed budgeting and organisation to integrated models also allows for NTD prioritisation to be fitted within broader health goals within a country [230]. Cross-sectoral integration of NTD elimination with poverty reduction or nutrition programmes would align with a One Health approach to creating sustainable changes via addressing underlying determinants of NTD burdens [215,227,231]. Integration also facilitates interdisciplinary collaboration between different governmental departments and ministries; this has been done by Iraq, Morocco and Nepal in their successful trachoma elimination programmes [106,110,112]. To support integration, the WHO has developed a strategic framework for integration of skin NTDs [232], and in 2022, 11 countries endemic for at least two skin NTDs had already implemented integrated strategies [12]. Similar approaches could be applied to 'ocular NTDs' via general eye health programmes [233]. Ultimately, governments should aim to fully integrate NTD interventions into health systems.

A critical challenge to integrating NTD efforts into PHC is the current weakness of health systems in many NTD-endemic regions [219]. Without a strong healthcare foundation, integrating NTD efforts into PHC will not be feasible or sustainable. A prime historical example of this is India's failed yaws elimination efforts, which partly relied on general health services that were non-existent in some areas [178] (S5 Table). Weak health systems also hinder the durability of programmes and maintain reliance on external support if NTD programmes and health victories cannot be sustained by the existing health sector. In areas where PHC is underdeveloped or non-existent, strengthening health infrastructure, resources, and workforce capacity first is essential [219,234]. National governments and international stakeholders must collaborate to engage the various elements required to create strong health systems, including robust governance and leadership, political commitment to action, national investment and accountability, prioritisation of quality care and health outcomes [235], and sufficient trained workforce [236].



The global community's support is needed to prevent socio-political instability and conflicts which disrupt and delay health initiatives including NTD control. Disruptions to NTD programmes' operations, infrastructure, partnerships, and funding alongside population displacement and limited access to conflict regions impede the programmes' ability to apply interventions. Examples of this include (1) Uganda's eventually successful GWD elimination programme which suffered delayed implementation of interventions, loss of personnel, and importation of cases due to civil conflicts [59], and (2) Mali's trachoma efforts which prevailed despite a military coup d'état leading to socio-political instability and withdrawal of donor support [107]. More recently, conflicts and instability are adversely impacting NTD research in Sudan [237] and overall health infrastructure in the Democratic Republic of the Congo [238]. Health diplomacy, as practiced by the Carter Center, is important for achieving and sustaining health victories and progress towards NTD elimination (S4a Table). This work should aim for peaceful power transitions where health provision is prioritised. As conflict-caused displacement of people may cause NTDs to spread to new geographical areas [206], healthy regional diplomatic relations can ensure robust prevention, preparation, and responses to these challenges. Indeed, adjacent countries and regions cannot eliminate NTDs in isolation of each other, and can benefit from shared regional One Health approaches [215]. Cross-border collaboration and initiatives, such as the Pan African Tsetse and Trypanosomiasis Eradication Campaign against HAT [239], may reduce spread of cases across borders and ensure no infection reservoirs remain unaddressed, thus helping sustain elimination progress. This may be particularly important in Africa, where 49 countries, and possibly more, are each affected by multiple NTDs (Fig 2).

Overall, we recommend that in ongoing and future NTD control and elimination initiatives, countries systematically carry out dedicated efforts and tailored interventions through to post-elimination stages to prevent resurgence. More must be done to facilitate increased integration of programmes and transition away from siloed approaches. To allow for integration into PHC, health systems must first be strengthened. The eight elimination strategies presented in this review should be integrated and One Health approaches prioritised for cross-cutting impact. Country ownership, leadership, and accountability are essential throughout the entire elimination process and beyond. International partners must continue to support integration and health system strengthening, while both domestic and international funding should be increased. However, reducing reliance on external support is crucial. Lessons from past efforts should be carefully considered to avoid the repetition of mistakes; this includes maintaining prioritisation, ensuring adequate resources, practicing health diplomacy, fostering regional collaboration, and avoiding complacency.

A key strength of this review is its originality: the synthesised evidence from successful NTD elimination programmes presented here fills a gap in literature as similar work has not been previously published. The literature review was conducted in a rigorous, reproducible and comprehensive manner facilitated by the inclusion of both published and grey literature. A conservative approach to data extraction was employed: only explicit statements of information were included, and no data or information was inferred. An exception to this was where elimination programme integration level was assumed to be stand-alone when no explicit information on integration was provided. The timeliness of this study is highlighted by the pressing challenge of achieving the WHO's global NTD targets by 2030, including 100 countries eliminating an NTD, and yaws and Guinea worm disease being eradicated. Currently, 44 more countries must eliminate one or more NTDs to reach the target of 100 countries by 2030. The blueprint for NTD elimination presented in this review provides actionable insights and lessons for governments, policymakers, and international stakeholders to consider in expediting the control and elimination of NTDs.

Despite the comprehensiveness of this review, there were some missing details on the programmes in the countries analysed, including incomplete data on types of support provided by partners and historical programmes. Furthermore, data on programme integration was often fragmented, hence forming a complete picture of this was challenging. In the data syntheses in this review, these data gaps reflect absence of evidence rather than evidence of absence. A further methodological limitation is that Ministries of Health, partner organisations, or other stakeholders were not directly contacted for information. The search strategies employed to retrieve published literature contained terminology only in

English, hence, only publications originally in or translated into English were retrieved, possibly limiting comprehensiveness. Furthermore, literature searches and screening were conducted by two individuals within a short time frame, and second literature searches and screening were only conducted on PubMed. Factors limiting the reliability of included grey literature sources include variability in reporting standards, lack of peer-review, and potential biases; these were mitigated by choice of credible organisations as sources and cross-checking findings where possible. Finally, as the latest eliminations of gHAT in Chad and Guinea, LF in Brazil and Timor-Leste, trachoma in Pakistan, Vietnam, India, Mauritania and Papua New Guinea, onchocerciasis in Niger, and leprosy for the first time in Jordan, were all validated or verified after March 2024 [13–18,240–244], their elimination processes are excluded from this review.

To overcome the data gaps which have limited this review, future research and elimination programme documentation efforts should focus on accurately and consistently recording programmatic functioning of elimination programmes. Standardised methodology for countries to document and report NTD control and elimination efforts is required. The move by the WHO encouraging the collection of gender-disaggregated data and more granular data through precision infection mapping will improve the quality of data collected, and consequently produce better targeted elimination efforts where infection hotspots occur. Furthermore, cost-effectiveness evaluations should be conducted to define the most economical approaches to NTD elimination, especially in resource-limited countries. As more NTDs approach elimination, the cost-effectiveness of interventions previously used in high-prevalence settings may diminish, making these evaluations increasingly important [245]. The WHO's road map operational plan 2025–2030 is planned to include estimated costs of certain NTD-targeting interventions to facilitate resource mobilisation and optimisation [12]. Future study should also determine total costs of elimination programmes to facilitate efficient budgeting. Additionally, while this study provides a foundational blueprint, it did not delve into the specific factors that differentiate countries that have successfully eliminated more than two NTDs, such as Togo, Benin and Ghana, from those facing delays in elimination. Future work should aim to systematically examine these contrasting experiences to identify critical programmatic, contextual, and operational factors that contribute to success or hinder progress. Such in-depth comparative analyses could offer valuable insights for tailoring interventions, optimising resource allocation, and informing policy decisions to accelerate elimination efforts in struggling settings.

## Conclusions

Taken the lessons learnt from both the successful and failed NTD elimination efforts to date, to accelerate NTD elimination countries must have ownership over elimination efforts and sustain their commitment to efforts long-term. Dedicated efforts and the use of tailored and cross-cutting strategies, including the eight presented in this review, are essential to success. Increased integration of programmes to cover multiple NTDs and other diseases, and programme mainstreaming into national health systems, are required for increased programme interdisciplinarity, resilience and efficiency. Crucially, advancing elimination efforts demands a shift towards cross-cutting One Health approaches that bridge human, animal and ecosystem health; these include water, sanitation and hygiene (WASH), integrated vector control, health system strengthening, and ecosystem-based interventions. Addressing underlying social and environmental determinants of health via systems thinking must be prioritised. Additionally, there must be increased domestic and international investment towards NTD elimination initiatives, with partner organisations committing to supporting integrated One Health initiatives with increasingly domestically sourced funding. Exercising health diplomacy to create regional collaborations is necessary to eliminate infection reservoirs and reduce geographical spread of NTDs, particularly in the context of increasing global mobility, conflicts, and climate-related health challenges. Lessons from failed historical elimination efforts must be learnt and remembered to avoid repetition of mistakes.

Moreover, gaps in data and unavailability of comprehensive documentation continue to hinder a full understanding of global elimination efforts. Moving forward, systematic and standardised reporting and improved collaboration between national governments and international partners will be critical to sustaining progress. Addressing these gaps will enhance

future elimination initiatives, ensuring more efficient use of resources and supporting the achievement of the WHO's 2030 NTD control, elimination, and eradication goals. For NTDs such as schistosomiasis which already exhibit features of successful elimination programmes identified here, it is also critical to understand why they have not yet been eliminated in a single country. Identifying and addressing these elimination bottlenecks will ensure no NTD is left behind in global NTD elimination efforts.

## Supporting information

**S1 Table. Abbreviations, acronyms and their definitions used in figures and tables of this review.**

(S1\_Table.DOCX)

**S2 Table. Additional detailed information on the employment of the eight NTD elimination strategies across the 50 countries [246–252].**

(S2\_Table.DOCX)

**S3 Table. Partners having supported one or two elimination programmes.**

(S3\_Table.DOCX)

**S4 Table. (a)** Detailed aspects and examples of NTD elimination support provided by the WHO and Carter Center, presented in Fig 7. **(b)** Detailed aspects and examples of NTD elimination support provided by some of the partners presented in Fig 7 [253–257].

(S4\_Table.DOCX)

**S5 Table. Additional details of failed historical NTD control efforts [258].**

(S5\_Table.DOCX)

## Acknowledgments

We thank all the members of the Parasite Immuno-epidemiology Group at the University of Edinburgh for their helpful comments in shaping this manuscript.

## References

1. Swe MMM, Phyo AP, Cooper BS, White NJ, Smithuis F, Ashley EA. A systematic review of neglected tropical diseases (NTDs) in Myanmar. *PLoS Negl Trop Dis*. 2023;17(11):e0011706. <https://doi.org/10.1371/journal.pntd.0011706> PMID: 37910592
2. Semahegn A, Manyazewal T, Getachew E, Fekadu B, Assefa E, Kassa M, et al. Burden of neglected tropical diseases and access to medicine and diagnostics in Ethiopia: a scoping review. *Syst Rev*. 2023;12(1):140. <https://doi.org/10.1186/s13643-023-02302-5> PMID: 37580784
3. World Health Organization. WHO officially recognizes noma as a neglected tropical disease [Internet]. [cited 2024 Jan 17]. Available from: <https://www.who.int/news/item/15-12-2023-who-officially-recognizes-noma-as-a-neglected-tropical-disease>
4. World Health Organization. Ending the neglect to attain the Sustainable Development Goals: A road map for neglected tropical diseases 2021–2030 [Internet]. 2021. Available from: <https://www.who.int/publications/i/item/9789240010352>
5. The Lancet Regional Health-Western Pacific. To end the neglect of neglected tropical diseases. *Lancet Reg Health West Pac*. 2022;18:100388. <https://doi.org/10.1016/j.lanwpc.2022.100388> PMID: 35141664
6. The Expanded Special Project for Elimination of Neglected Tropical Diseases—ESPEN. A global health best buy [Internet]. [cited 2025 Jan 15]. Available from: [https://espen.afro.who.int/system/files/content/resources/ESPEN\\_A\\_Global\\_Health\\_Best\\_Buy.pdf](https://espen.afro.who.int/system/files/content/resources/ESPEN_A_Global_Health_Best_Buy.pdf)
7. World Health Organization. Neglected tropical diseases [Internet]. [cited 2024 Jan 17]. Available from: [https://www.who.int/health-topics/neglected-tropical-diseases#tab=tab\\_2](https://www.who.int/health-topics/neglected-tropical-diseases#tab=tab_2)
8. Mutapi F. A new roadmap for neglected tropical diseases. *Nat Africa*. 2022.
9. Uniting to Combat NTDs. Uniting to Combat NTDs. [cited 2024 Jan 17]. The Kigali Declaration. Available from: <https://unitingtocombatntds.org/en/the-kigali-declaration/>

10. World Health Organization. Ending the neglect to attain the sustainable development goals: a rationale for continued investment in tackling neglected tropical diseases 2021–2030 [Internet]. [cited 2024 Jul 31]. Available from: <https://www.who.int/publications/i/item/9789240052932>
11. World Health Organization. Ending the neglect to attain the sustainable development goals: One health: approach for action against neglected tropical diseases 2021–2030. World Health Organization. 2022 [cited 2024 May 12]. Available from: <https://iris.who.int/handle/10665/351193>
12. World Health Organization. Global report on neglected tropical diseases 2024 [Internet]. World Health Organization; 2024 [cited 2024 May 4]. Available from: <https://iris.who.int/handle/10665/376657>
13. World Health Organization. Human African trypanosomiasis eliminated as a public health problem in Chad [Internet]. [cited 2024 Jul 29]. Available from: <https://www.who.int/publications/i/item/who-wer-9920-269-270>
14. World Health Organization. Jordan becomes first country to receive WHO verification for eliminating leprosy [Internet]. [cited 2024 Oct 6]. Available from: <https://www.who.int/news/item/19-09-2024-jordan-becomes-first-country-to-receive-who-verification-for-eliminating-leprosy>
15. World Health Organization. Brazil eliminates lymphatic filariasis as a public health problem [Internet]. [cited 2024 Oct 6]. Available from: <https://www.who.int/news/item/01-10-2024-brazil-eliminates-lymphatic-filariasis-as-a-public-health-problem>
16. World Health Organization. Elimination of lymphatic filariasis as a public health problem in Timor-Leste [Internet]. [cited 2024 Oct 24]. Available from: <https://www.who.int/southeastasia/news/feature-stories/detail/elimination-of-lymphatic-filariasis-as-a-public-health-problem-in-timor-leste>
17. World Health Organization. Guinea eliminates human African trypanosomiasis as a public health problem [Internet]. [cited 2025 May 30]. Available from: <https://www.who.int/news/item/29-01-2025-guinea-eliminates-human-african-trypanosomiasis-as-a-public-health-problem>
18. World Health Organization. Papua New Guinea eliminates trachoma as a public health problem [Internet]. [cited 2025 May 30]. Available from: <https://www.who.int/news/item/19-05-2025-papua-new-guinea-eliminates-trachoma-as-a-public-health-problem>
19. World Health Organization. Global report on neglected tropical diseases. 2023 [Internet]. [cited 2024 Jan 17]. Available from: <https://www.who.int/publications-detail-redirect/9789240067295>
20. Fitzpatrick C, Sankara DP, Agua JF, Jonnalagedda L, Rumi F, Weiss A, et al. The cost-effectiveness of an eradication programme in the end game: evidence from guinea worm disease. *PLoS Negl Trop Dis*. 2017;11(10):e0005922. <https://doi.org/10.1371/journal.pntd.0005922> PMID: 28981510
21. World Health Organization. Dracunculiasis (guinea-worm disease) WHO fact sheet [Internet]. [cited 2024 Sep 5]. Available from: [https://www.who.int/news-room/fact-sheets/detail/dracunculiasis-\(guinea-worm-disease\)](https://www.who.int/news-room/fact-sheets/detail/dracunculiasis-(guinea-worm-disease))
22. World Health Organization. Trypanosomiasis, human African (sleeping sickness) [Internet]. [cited 2024 Jan 17]. Available from: [https://www.who.int/news-room/fact-sheets/detail/trypanosomiasis-human-african-\(sleeping-sickness\)](https://www.who.int/news-room/fact-sheets/detail/trypanosomiasis-human-african-(sleeping-sickness))
23. World Health Organization. Elimination of human African trypanosomiasis as a public health problem validated in Equatorial Guinea [Internet]. [cited 2024 Sep 5]. Available from: <https://www.who.int/news/item/20-06-2022-elimination-of-human-african-trypanosomiasis-as-a-public-health-problem-validated-in-equatorial-guinea>
24. World Health Organization. Validation of elimination of lymphatic filariasis as a public health problem [Internet]. [cited 2024 May 4]. Available from: <https://www.who.int/publications-detail-redirect/9789241511957>
25. World Health Organization. Guidelines for stopping mass drug administration and verifying elimination of human onchocerciasis [Internet]. [cited 2024 May 4]. Available from: <https://www.who.int/publications-detail-redirect/9789241510011>
26. World Health Organization. Strategic framework for elimination of human rabies transmitted by dogs in the South-East Asia Region [Internet]. [cited 2024 Sep 5]. Available from: <https://www.who.int/publications/i/item/9789290224174>
27. World Health Organization. Validation of elimination of trachoma as a public health problem [Internet]. [cited 2024 May 4]. Available from: <https://www.who.int/publications-detail-redirect/who-htm-ntd-2016.8>
28. World Health Organization. Regional Strategic Framework for accelerating and sustaining elimination of kala-azar in the South-East Asia Region [Internet]. [cited 2024 May 4]. Available from: <https://www.who.int/publications-detail-redirect/9789290209812>
29. World Health Organization. Leishmaniasis [Internet]. [cited 2024 May 4]. Available from: <https://www.who.int/news-room/fact-sheets/detail/leishmaniasis>
30. World Health Organization. Eradication of yaws – procedures for verification and certification of interruption of transmission [Internet]. [cited 2024 May 4]. Available from: <https://www.who.int/publications-detail-redirect/9789241512909>
31. World Health Organization. Generic Framework for Control, Elimination and Eradication of Neglected Tropical Diseases [Internet]. 2016. Available from: [https://iris.who.int/bitstream/handle/10665/205080/WHO\\_HTM\\_NTD\\_2016.6\\_eng.pdf](https://iris.who.int/bitstream/handle/10665/205080/WHO_HTM_NTD_2016.6_eng.pdf)
32. The Carter Center. South Sudan [Internet]. [cited 2024 Jun 25]. Available from: <https://www.cartercenter.org/countries/south-sudan.html>
33. The Carter Center. Ethiopia [Internet]. [cited 2024 Jun 25]. Available from: <https://www.cartercenter.org/countries/ethiopia.html>
34. The Carter Center. Angola [Internet]. [cited 2024 Jun 25]. Available from: <https://www.cartercenter.org/countries/angola.html>
35. The Carter Center. Mali [Internet]. [cited 2024 Jun 25]. Available from: <https://www.cartercenter.org/countries/mali.html>
36. The Carter Center. Chad [Internet]. [cited 2024 Jun 25]. Available from: <https://www.cartercenter.org/countries/chad.html>
37. World Health Organization. Number of new reported cases of human African trypanosomiasis (T.b. rhodesiense) [Internet]. [cited 2024 Apr 24]. Available from: [https://www.who.int/data/gho/data/indicators/indicator-details/GHO/number-of-new-reported-cases-of-human-african-trypanosomiasis-\(t-b-rhodesiense\)](https://www.who.int/data/gho/data/indicators/indicator-details/GHO/number-of-new-reported-cases-of-human-african-trypanosomiasis-(t-b-rhodesiense))



38. World Health Organization. Number of reported cases of human African trypanosomiasis (T.b. gambiense) [Internet]. [cited 2024 Apr 24]. Available from: <https://www.who.int/data/gho/data/indicators/indicator-details/GHO/hat-tb-gambiense>
39. World Health Organization. Lymphatic filariasis (Elephantiasis) [Internet]. [cited 2024 Apr 25]. Available from: <https://www.who.int/data/gho/data/themes/topics/lymphatic-filariasis>
40. World Health Organization. Status of endemicity of visceral leishmaniasis [Internet]. [cited 2024 Apr 25]. Available from: <https://www.who.int/data/gho/data/indicators/indicator-details/GHO/status-of-endemicity-of-visceral-leishmaniasis>
41. World Health Organization. Rabies [Internet]. [cited 2024 Apr 25]. Available from: <https://www.who.int/data/gho/data/themes/topics/rabies>
42. World Health Organization. Status of elimination of trachoma as a public health problem [Internet]. [cited 2024 Apr 24]. Available from: <https://www.who.int/data/gho/data/indicators/indicator-details/GHO/status-of-elimination-of-trachoma-as-a-public-health-problem>
43. World Health Organization. Status of endemicity of onchocerciasis [Internet]. [cited 2024 Jun 25]. Available from: <https://www.who.int/data/gho/data/indicators/indicator-details/GHO/status-of-endemicity-of-onchocerciasis>
44. World Health Organization. Status of yaws endemicity [Internet]. [cited 2024 Jun 25]. Available from: <https://www.who.int/data/gho/data/indicators/indicator-details/GHO/status-of-yaws-endemicity>
45. World Health Organization. IRIS Home [Internet]. [cited 2024 May 4]. Available from: <https://iris.who.int/>
46. World Health Organization. Neglected tropical diseases [Internet]. [cited 2024 May 5]. Available from: <https://www.who.int/data/gho/data/themes/neglected-tropical-diseases>
47. World Health Organization. Country NTD Master Plans | ESPEN [Internet]. [cited 2024 Apr 27]. Available from: <https://espen.afro.who.int/tools-resources/documents/country-ntd-master-plans>
48. Ministère de la Santé et de la Lutte Contre le SIDA, Directeur National des Maladies Tropicales Négligées de Côte d'Ivoire 2016-2020, République de Côte d'Ivoire. Plan Directeur National de Lutte Contre les Maladies Tropicales Négligées 2016-2020 [Internet]. [cited 2024 Mar 21]. Available from: [https://espen.afro.who.int/system/files/content/resources/COTE\\_DIVOIRE\\_NTD\\_Master\\_Plan\\_2016\\_2020.pdf](https://espen.afro.who.int/system/files/content/resources/COTE_DIVOIRE_NTD_Master_Plan_2016_2020.pdf)
49. Ghana Public Health Division, Ghana Health Service. Master Plan for Neglected Tropical Diseases Programme, Ghana (2016-2020) [Internet]. [cited 2024 Mar 21]. Available from: [https://espen.afro.who.int/system/files/content/resources/GHANA\\_NTD\\_Master\\_Plan\\_2016\\_2020.pdf](https://espen.afro.who.int/system/files/content/resources/GHANA_NTD_Master_Plan_2016_2020.pdf)
50. Ministère de la Santé et de la Protection Sociale, République Togolaise. Plan Directeur National de Lutte Intégrée Contre les Maladies Tropicales Négligées 2016-2020 [Internet]. 2015 [cited 2024 Mar 20]. Available from: [https://espen.afro.who.int/system/files/content/resources/TOGO\\_NTD\\_Master\\_Plan\\_2016\\_2020.pdf](https://espen.afro.who.int/system/files/content/resources/TOGO_NTD_Master_Plan_2016_2020.pdf)
51. The Carter Center. Benin [Internet]. [cited 2024 Mar 21]. Available from: <https://www.cartercenter.org/countries/benin.html>
52. Sam-Abbenyi A, Dama M, Graham S, Obate Z. Dracunculiasis in Cameroon at the threshold of elimination. *Int J Epidemiol*. 1999;28(1):163–8.
53. The Carter Center. Côte d'Ivoire [Internet]. [cited 2024 Mar 21]. Available from: <https://www.cartercenter.org/countries/cote-divoire.html>
54. Secrétariat Général, Direction de Lutte Contre la Maladie, Ministère de la Santé Publique, République Démocratique du Congo. Plan Stratégique de Lutte Contre les Maladies Tropicales Négligées à Chimiothérapie Préventive 2016-2020 [Internet]. 2016 [cited 2024 Mar 21]. Available from: [https://espen.afro.who.int/system/files/content/resources/DRC\\_NTD\\_Master\\_Plan\\_2016\\_2020.pdf](https://espen.afro.who.int/system/files/content/resources/DRC_NTD_Master_Plan_2016_2020.pdf)
55. Ministry of Health and Family Welfare, Government of India. IHIP-Guinea Worm Eradication Programme [Internet]. [cited 2024 Mar 24]. Available from: <https://ihip.mohfw.gov.in/gwep/#!/guinea>
56. Ministère de la Santé Publique, Secrétariat Général, Direction des Études et de la Programmation, République du Niger. Plan Directeur de Lutte Contre les Maladies Tropicales Négligées Niger 2016-2020 [Internet]. [cited 2024 Mar 23]. Available from: [https://espen.afro.who.int/system/files/content/resources/NIGER\\_NTD\\_Master\\_Plan\\_2016\\_2020.pdf](https://espen.afro.who.int/system/files/content/resources/NIGER_NTD_Master_Plan_2016_2020.pdf)
57. The Carter Center. Nigeria [Internet]. [cited 2024 Mar 25]. Available from: <https://www.cartercenter.org/countries/nigeria.html>
58. Hopkins DR, Ruiz-Tiben E, Azam M, Kappus KD. Eradication of dracunculiasis from Pakistan. *Lancet*. 1995;346(8975).
59. Rwakimari JB, Hopkins DR, Ruiz-Tiben E. Uganda's successful Guinea worm eradication program. *Am J Trop Med Hyg*. 2006;75(1):3–8.
60. The Carter Center. Yemen [Internet]. [cited 2024 Mar 25]. Available from: <https://www.cartercenter.org/countries/yemen.html>
61. Ministère de la Santé, Burkina Faso. Plan Stratégique de Lutte Contre les Maladies Tropicales Négligées 2016-2020 Burkina Faso [Internet]. 2016 [cited 2024 Mar 21]. Available from: [https://espen.afro.who.int/system/files/content/resources/BURKINA\\_FASO\\_NTD\\_Master\\_Plan\\_2016\\_2020.pdf](https://espen.afro.who.int/system/files/content/resources/BURKINA_FASO_NTD_Master_Plan_2016_2020.pdf)
62. The Carter Center. Cameroon [Internet]. [cited 2024 Mar 21]. Available from: <https://www.cartercenter.org/countries/cameroon.html>
63. Weiss AJ, Vestergaard Frandsen T, Ruiz-Tiben E, Hopkins DR, Aseidu-Bekoe F, Agyemang D. What it means to be guinea worm free: an insider's account from Ghana's northern region. *Am J Trop Med Hyg*. 2018;98(5):1413–8. <https://doi.org/10.4269/ajtmh.17-0558> PMID: 29557333
64. The Carter Center. Mauritania [Internet]. [cited 2024 Mar 25]. Available from: <https://www.cartercenter.org/countries/mauritania.html>
65. Federal Ministry of Health, Government of Nigeria. Neglected Tropical Diseases Nigeria Multi-Year Master Plan 2015-2020 [Internet]. 2015 [cited 2024 Mar 23]. Available from: [https://espen.afro.who.int/system/files/content/resources/NIGERIA\\_NTD\\_Master\\_Plan\\_2015\\_2020.pdf](https://espen.afro.who.int/system/files/content/resources/NIGERIA_NTD_Master_Plan_2015_2020.pdf)
66. Ruiz-Tiben E, Hopkins DR. Dracunculiasis (Guinea worm disease) eradication. *Adv Parasitol*. 2006;61:275–309.
67. Biswas G, Sankara DP, Agua-Agum J, Maiga A. Dracunculiasis (guinea worm disease): eradication without a drug or a vaccine. *Philos Trans R Soc Lond B Biol Sci*. 2013;368(1623):20120146.



68. The Carter Center. Central African Republic [Internet]. [cited 2024 Mar 21]. Available from: <https://www.cartercenter.org/countries/central-african-re-public.html>
69. Ministère de la Santé et de l'Action Sociale, Direction Générale de la Santé, Direction de la Lutte contre la Maladie, République du Sénégal. Plan Stratégique de Lutte Intégrée Contre les Maladies Tropicales Négligées 2016-2020, République du Sénégal [Internet]. 2016 [cited 2024 Mar 23]. Available from: [https://espen.afro.who.int/system/files/content/resources/SENEGAL\\_NTD\\_Master\\_Plan\\_2016\\_2020.pdf](https://espen.afro.who.int/system/files/content/resources/SENEGAL_NTD_Master_Plan_2016_2020.pdf)
70. Division of Vector Borne and Neglected Tropical Diseases, Ministry of Health (Kenya). Kenya National Master Plan for the Elimination of Neglected Tropical Diseases, 2023 - 2027 [Internet]. 2022 [cited 2024 Mar 23]. Available from: [https://espen.afro.who.int/system/files/content/resources/KENYA\\_NTD\\_MASTER\\_PLAN\\_2023\\_2027.pdf](https://espen.afro.who.int/system/files/content/resources/KENYA_NTD_MASTER_PLAN_2023_2027.pdf)
71. The Carter Center. Uganda [Internet]. [cited 2024 Mar 25]. Available from: <https://www.cartercenter.org/countries/uganda.html>
72. Ministère de la Santé, République du Bénin. Plan Directeur National de Lutte Contre les Maladies Tropicales Négligées 2016-2020 [Internet]. 2016 [cited 2024 Mar 21]. Available from: [https://espen.afro.who.int/system/files/content/resources/BENIN\\_NTD\\_Master\\_Plan\\_2016\\_2020.pdf](https://espen.afro.who.int/system/files/content/resources/BENIN_NTD_Master_Plan_2016_2020.pdf)
73. Simarro PP, Franco JR, Ndongo P, Nguema E, Louis FJ, Jannin J. The elimination of *Trypanosoma brucei* gambiense sleeping sickness in the focus of Luba, Bioko Island, Equatorial Guinea. *Trop Med Int Health*. 2006;11(5):636–46.
74. World Health Organization. Stakeholders meet in WHO to review progress towards elimination of human African trypanosomiasis [Internet]. [cited 2024 Mar 21]. Available from: <https://www.who.int/news/item/08-06-2023-stakeholders-meet-in-who-to-review-progress-towards-elimination-of-human-african-trypanosomiasis>
75. Ministry of Health, the Republic of Uganda. Uganda Neglected Tropical Diseases Master Plan 2023-2027 [Internet]. [cited 2024 Mar 21]. Available from: [https://espen.afro.who.int/system/files/content/resources/Uganda\\_NTD\\_Master\\_Plan\\_2023\\_2027\\_Final.pdf](https://espen.afro.who.int/system/files/content/resources/Uganda_NTD_Master_Plan_2023_2027_Final.pdf)
76. Karim MJ, Haq R, Mablesen HE, Sultan Mahmood ASM, Rahman M, Chowdhury SM, et al. Developing the first national database and map of lymphatic filariasis clinical cases in Bangladesh: another step closer to the elimination goals. *PLoS Negl Trop Dis*. 2019;13(7):e0007542. <https://doi.org/10.1371/journal.pntd.0007542> PMID: 31306409
77. Khieu V, Or V, Tep C, Odermatt P, Tsuyuoka R, Char MC, et al. How elimination of lymphatic filariasis as a public health problem in the Kingdom of Cambodia was achieved. *Infect Dis Poverty*. 2018;7(1):15. <https://doi.org/10.1186/s40249-018-0394-7> PMID: 29463307
78. Ave C, Kapa DR, Ottesen E. Elimination of lymphatic filariasis as a public health problem from the Cook Islands. *Trop Med Health*. 2018;46:12. <https://doi.org/10.1186/s41182-018-0094-9> PMID: 29785168
79. Ramzy RMR, Kamal HA, Hassan MA, Haggag AA. Elimination of lymphatic filariasis as a public health problem from the Arab Republic of Egypt. *Acta Trop*. 2019;199:105121.
80. Chipwanya J, Mkwanda S, Kabuluzi S, Mzilahowa T, Ngwira B, Matipula DE, et al. Elimination of lymphatic filariasis as a public health problem in Malawi. *PLoS Negl Trop Dis*. 2024;18(2):e0011957. <https://doi.org/10.1371/journal.pntd.0011957> PMID: 38363794
81. Carlingford CN, Melrose W, Mokoia G, Graves PM, Ichimori K, Capuano C. Elimination of lymphatic filariasis as a public health problem in Niue under PacELF, 1999–2016. *Trop Med Health*. 2019;47(1):20.
82. Rahman MA, Yahathugoda TC, Tojo B, Premaratne P, Nagaoka F, Takagi H. A surveillance system for lymphatic filariasis after its elimination in Sri Lanka. *Parasitol Int*. 2019;68(1):73–8.
83. World Health Organization Regional Office for South-East Asia. Expert mission to Sri Lanka for verification of elimination of lymphatic filariasis: Report of the mission, 12–18 June 2011. 2012 [cited 2024 Mar 20]; Available from: <https://iris.who.int/handle/10665/205057>
84. Rojanapansu S, Tothong T, Boondej P, Thammapalo S, Khuanyoung N, Santabutr W, et al. How Thailand eliminated lymphatic filariasis as a public health problem. *Infect Dis Poverty*. 2019;8(1):38. <https://doi.org/10.1186/s40249-019-0549-1> PMID: 31130143
85. Dorkenoo MA, Tchankoni MK, Yehadji D, Yakpa K, Tchalim M, Sossou E, et al. Monitoring migrant groups as a post-validation surveillance approach to contain the potential reemergence of lymphatic filariasis in Togo. *Parasit Vectors*. 2021;14(1):134. <https://doi.org/10.1186/s13071-021-04644-2> PMID: 33653393
86. Ofanoa R, Ofa T, Padmasiri EA, Kapa DR. Elimination of lymphatic filariasis as a public health problem from Tonga. *Trop Med Health*. 2019;47:43. <https://doi.org/10.1186/s41182-019-0169-2> PMID: 31346312
87. Allen T, Taleo F, Graves PM, Wood P, Taleo G, Baker MC. Impact of the lymphatic filariasis control program towards elimination of filariasis in Vanuatu, 1997–2006. *Trop Med Health*. 2017;45:8.
88. Taleo F, Taleo G, Graves PM, Wood P, Kim SH, Ozaki M, et al. Surveillance efforts after mass drug administration to validate elimination of lymphatic filariasis as a public health problem in Vanuatu. *Trop Med Health*. 2017;45:18. <https://doi.org/10.1186/s41182-017-0057-6> PMID: 28630586
89. Nguyen HM, Do DT, Greiman SE, Nguyen HV, Hoang HV, Phan TQ. An overview of human helminthoses in Vietnam: their prevention, control and lessons learnt. *Acta Trop*. 2023;238:106753.
90. Dung DT, Binh VTL, Worrell CM, Brady M, Walsh V, Yajima A, et al. Evaluation of a facility-based inspection tool to assess lymphedema management services in Vietnam. *PLoS Negl Trop Dis*. 2020;14(10):e0008773. <https://doi.org/10.1371/journal.pntd.0008773> PMID: 33075056
91. Al-Kubati AS, Al-Samie AR, Al-Kubati S, Ramzy RMR. The story of lymphatic filariasis elimination as a public health problem from Yemen. *Acta Trop*. 2020;212:105676.
92. World Health Organization. Bangladesh eliminates lymphatic filariasis [Internet]. [cited 2024 Mar 18]. Available from: <https://www.who.int/southeastasia/news/detail/13-05-2023-bangladesh-eliminates-lymphatic-filariasis>

93. World Health Organization. Egypt: first country in Eastern Mediterranean region to eliminate lymphatic filariasis [Internet]. [cited 2024 Mar 20]. Available from: <https://www.who.int/news/item/12-03-2018-egypt-first-country-in-eastern-mediterranean-region-to-eliminate-lymphatic-filariasis>
94. Nicholls RS, Duque S, Olaya LA, López MC, Sánchez SB, Morales AL, et al. Elimination of onchocerciasis from Colombia: first proof of concept of river blindness elimination in the world. *Parasit Vectors*. 2018;11(1):237. <https://doi.org/10.1186/s13071-018-2821-9> PMID: 29642939
95. Richards FO Jr, Klein RE, de León O, Mendizábal-Cabrera R, Morales AL, Cama V, et al. A knowledge, attitudes and practices survey conducted three years after halting ivermectin mass treatment for onchocerciasis in Guatemala. *PLoS Negl Trop Dis*. 2016;10(6):e0004777. <https://doi.org/10.1371/journal.pntd.0004777> PMID: 27341104
96. Fernández-Santos NA, Prado-Velasco FG, Damián-González DC, Unnasch TR, Rodríguez-Pérez MA. Historical review and cost-effectiveness assessment of the programs to eliminate onchocerciasis and trachoma in Mexico. *Res Rep Trop Med*. 2021;12:235–45.
97. World Health Organization. Progress towards eliminating onchocerciasis in the WHO Region of the Americas: verification of elimination of transmission in Mexico [Internet]. [cited 2024 Mar 20]. Available from: <https://www.who.int/publications-detail-redirect/who-wer9043>
98. World Health Organization. Progress towards eliminating onchocerciasis in the WHO Region of the Americas: verification of elimination of transmission in Guatemala [Internet]. [cited 2024 Mar 20]. Available from: <https://www.who.int/publications-detail-redirect/who-wer9143-501-505>
99. Guevara Á, Lovato R, Proaño R, Rodríguez-Pérez MA, Unnasch T, Cooper PJ. Elimination of onchocerciasis in Ecuador: findings of post-treatment surveillance. *Parasit Vectors*. 2018;11:265.
100. González-Roldán JF, Undurraga EA, Meltzer MI, Atkins C, Vargas-Pino F, Gutiérrez-Cedillo V. Cost-effectiveness of the national dog rabies prevention and control program in Mexico, 1990–2015. *PLoS Negl Trop Dis*. 2021;15(3):e0009130. <https://doi.org/10.1371/journal.pntd.0009130>
101. International Coalition for Trachoma Control. Benin and Mali validated for eliminating trachoma as a public health problem [Internet]. [cited 2024 Mar 21]. Available from: <https://www.trachomacoalition.org/news-blogs/benin-and-mali-validated-eliminating-trachoma-public-health-problem>
102. Wang N, Deng S, Tian L. A review of trachoma history in China: research, prevention, and control. *Sci China Life Sci*. 2016;59(6).
103. Aboe A, Joof BM, Kanyi SK, Hydera A, Downs P, Bush S, et al. The Gambia has eliminated trachoma as a public health problem: challenges and successes. *PLoS Negl Trop Dis*. 2022;16(3):e0010282. <https://doi.org/10.1371/journal.pntd.0010282> PMID: 35344553
104. Debrah O, Mensah EO, Senyonjo L, de Souza DK, Hervie TE, Agyemang D, et al. Elimination of trachoma as a public health problem in Ghana: providing evidence through a pre-validation survey. *PLoS Negl Trop Dis*. 2017;11(12):e0006099. <https://doi.org/10.1371/journal.pntd.0006099> PMID: 29232708
105. Hammou J, Mohammadi F, Raisi AA, Harbi SA. Sustaining trachoma elimination: lessons from North Africa and the Middle East. *Community Eye Health*. 2019;32(105):23. PMID: 31409954
106. Balakrishnan VS. Iraq eliminates trachoma as a public health problem. *Lancet Infect Dis*. 2023;23(10):e404. [https://doi.org/10.1016/S1473-3099\(23\)00580-7](https://doi.org/10.1016/S1473-3099(23)00580-7) PMID: 37776886
107. Programme National de Lutte contre la Cécité (Mali), Helen Keller International, The Carter Center. Mali: achieving success along the path to trachoma elimination. *Comm Eye Health*. 2013;26(83):58–9.
108. Quesada-Cubo V, Damián-González DC, Prado-Velasco FG, Fernández-Santos NA, Sánchez-Tejeda G, Correa-Morales F, et al. The elimination of trachoma as a public health problem in Mexico: From national health priority to national success story. *PLoS Negl Trop Dis*. 2022;16(8):e0010660. <https://doi.org/10.1371/journal.pntd.0010660> PMID: 36037211
109. Hammou J, Ajaroumi HE, Hasbi H, Nakhlaoui A, Hmadna A, Maaroufi AE. In Morocco, the elimination of trachoma as a public health problem becomes a reality. *Lancet Glob Health*. 2017 Mar 1;5(3):e250–1.
110. Hammou J, Obtel M, Razine R, Berraho A, Belmekki M. Elimination of trachoma from Morocco: a historical review. *East Mediterr Health J*. 2020;26(6):713–9. <https://doi.org/10.26719/emhj.19.014> PMID: 32621507
111. World Health Organization Regional Office for South-East Asia. Elimination of Trachoma in Myanmar [Internet]. 2020 [cited 2024 Mar 21]. Available from: <https://iris.who.int/handle/10665/334209>
112. World Health Organization Regional Office for South-East Asia. Wiping out trachoma from Nepal: how Nepal eliminated trachoma as a public health problem [Internet]. 2018 [cited 2024 Mar 21]. Available from: <https://iris.who.int/handle/10665/276415>
113. Khandekar R. Elimination of blinding trachoma in Oman. *Oman Med J*. 2009;24(2):67–9.
114. Act to End NTDs West. Achieving the Last Mile Against Trachoma: Benin's Journey to Eliminating Trachoma [Internet]. 2023 [cited 2024 Mar 21]. Available from: <https://www.actntdswest.org/news/achieving-last-mile-against-trachoma-benins-journey-eliminating-trachoma>
115. World Health Organization. WHO congratulates Benin and Mali for eliminating trachoma as a public health problem [Internet]. [cited 2024 Mar 21]. Available from: <https://www.who.int/news/item/16-05-2023-who-congratulates-benin-and-mali-for-eliminating-trachoma-as-a-public-health-problem>
116. Nagi N. Bangladesh eliminates visceral leishmaniasis. *Lancet Microbe*. 2024;0(0).
117. Ahmed BN, Nabi SG, Rahman M, Selim S, Bashar A, Rashid MM. Kala-azar (Visceral Leishmaniasis) elimination in Bangladesh: successes and challenges. *Curr Trop Med Rep*. 2014;1(3):163–9.
118. World Health Organization. Elimination of yaws in India Weekly epidemiological record [Internet]. [cited 2024 Mar 18]. Available from: <https://www.who.int/publications-detail-redirect/who-wer8315>

119. Yajima A, Lin Z, Mohamed AJ, Dash AP, Rijal S. Finishing the task of eliminating neglected tropical diseases (NTDs) in WHO South-East Asia Region: promises kept, challenges, and the way forward. *Lancet Reg Health Southeast Asia*. 2023;18.
120. World Health Organization. Intervention strategies [Internet]. [cited 2024 Apr 21]. Available from: <https://www.who.int/teams/control-of-neglected-tropical-diseases/interventions/strategies>
121. World Health Organization. Preventive chemotherapy [Internet]. [cited 2024 Apr 25]. Available from: <https://www.who.int/teams/control-of-neglected-tropical-diseases/interventions/strategies/preventive-chemotherapy>
122. World Health Organization. Water, sanitation and hygiene (WASH) [Internet]. [cited 2024 Apr 25]. Available from: <https://www.who.int/teams/control-of-neglected-tropical-diseases/interventions/strategies/wash>
123. World Health Organization. Vector control [Internet]. [cited 2024 Apr 25]. Available from: <https://www.who.int/teams/control-of-neglected-tropical-diseases/interventions/strategies/vector-control>
124. World Health Organization. Veterinary public health [Internet]. [cited 2024 Apr 25]. Available from: <https://www.who.int/teams/control-of-neglected-tropical-diseases/interventions/strategies/veterinary-public-health>
125. The International Agency for the Prevention of Blindness. The International Agency for the Prevention of Blindness. [cited 2024 Mar 21]. Saudi Arabia eliminates trachoma as a public health problem. Available from: <https://www.iapb.org/news/saudi-arabia-eliminates-trachoma-as-a-public-health-problem/>
126. The Carter Center. Burkina Faso [Internet]. [cited 2024 Mar 21]. Available from: <https://www.cartercenter.org/countries/burkina-faso.html>
127. Hochberg N, Ruiz-Tiben E, Downs P, Fagan J, Maguire JH. The role of case containment centers in the eradication of dracunculiasis in Togo and Ghana. *Am J Trop Med Hyg*. 2008;79(5):722–8.
128. The Carter Center. Ghana [Internet]. [cited 2024 Mar 24]. Available from: <https://www.cartercenter.org/countries/ghana.html>
129. The Carter Center. Kenya [Internet]. [cited 2024 Mar 25]. Available from: <https://www.cartercenter.org/countries/kenya.html>
130. Ministry of Health Kenya. The Second Kenya National Strategic Plan for Control of Neglected Tropical Diseases 2016–2020 [Internet]. [cited 2024 Mar 23]. Available from: [https://espen.afro.who.int/system/files/content/resources/KENYA\\_NTD\\_Master\\_Plan\\_2016\\_2020.pdf](https://espen.afro.who.int/system/files/content/resources/KENYA_NTD_Master_Plan_2016_2020.pdf)
131. Cairncross S, Muller R, Zagaria N. Dracunculiasis (Guinea worm disease) and the eradication initiative. *Clin Microbiol Rev*. 2002;15(2):223–46. <https://doi.org/10.1128/CMR.15.2.223-246.2002> PMID: 11932231
132. The Carter Center. Niger [Internet]. [cited 2024 Mar 25]. Available from: <https://www.cartercenter.org/countries/niger.html>
133. Miri ES, Hopkins DR, Ruiz-Tiben E, Keana AS, Withers PC, Anagbogu IN. Nigeria's triumph: dracunculiasis eradicated. *Am J Trop Med Hyg*. 2010;83(2):215–25.
134. Njebuome NA, Hopkins DR, Richards FO, Anagbogu IN, Pearce PO, Jibril MM. Nigeria's war on terror: fighting dracunculiasis, onchocerciasis, lymphatic filariasis, and schistosomiasis at the grassroots. *Am J Trop Med Hyg*. 2009;80(5):691–8.
135. U.S. Centers for Disease Control and Prevention. Update: Dracunculiasis Eradication—Pakistan, 1994 [Internet]. [cited 2024 Mar 25]. Available from: <https://www.cdc.gov/mmwr/preview/mmwrhtml/00035864.htm>
136. The Carter Center. Senegal [Internet]. [cited 2024 Mar 25]. Available from: <https://www.cartercenter.org/countries/senegal.html>
137. World Health Organization. Dracunculiasis, Yemen [Internet]. [cited 2024 Mar 25]. Available from: <https://www.who.int/publications-detail-redirect/who-wer7603>
138. Kaba D, Koffi M, Kouakou L, N'Gouan EK, Djohan V, Courtin F, et al. Towards the sustainable elimination of gambiense human African trypanosomiasis in Côte d'Ivoire using an integrated approach. *PLoS Negl Trop Dis*. 2023;17(7):e0011514. <https://doi.org/10.1371/journal.pntd.0011514> PMID: 37523361
139. World Health Organization. Report of the second WHO stakeholders meeting on gambiense human African trypanosomiasis elimination, Geneva, 21–23 March 2016 [Internet]. World Health Organization; 2016 [cited 2024 Mar 21]. Available from: <https://iris.who.int/handle/10665/254067>
140. World Health Organization. Report of the third WHO stakeholders meeting on gambiense human African trypanosomiasis elimination: Geneva, Switzerland, 18–20 April 2018 [Internet]. World Health Organization; 2020 [cited 2024 Mar 21]. Available from: <https://iris.who.int/handle/10665/331217>
141. Koffi M, N'Djetchi M, Ilboudo H, Kaba D, Coulibaly B, N'Gouan E, et al. A targeted door-to-door strategy for sleeping sickness detection in low-prevalence settings in Côte d'Ivoire. *Parasite*. 2016;23:51. <https://doi.org/10.1051/parasite/2016059> PMID: 27849517
142. Bessell PR, Esterhuizen J, Lehane MJ, Longbottom J, Mugenyi A, Selby R, et al. Estimating the impact of tiny targets in reducing the incidence of Gambian sleeping sickness in the north-west Uganda focus. *Parasit Vectors*. 2021;14(1):410. <https://doi.org/10.1186/s13071-021-04889-x> PMID: 34407867
143. Hope A, Mugenyi A, Esterhuizen J, Tirados I, Cunningham L, Garrod G, et al. Scaling up of tsetse control to eliminate Gambian sleeping sickness in northern Uganda. *PLoS Negl Trop Dis*. 2022;16(6):e0010222. <https://doi.org/10.1371/journal.pntd.0010222> PMID: 35767572
144. World Health Organization. Report of the fourth WHO stakeholders meeting on gambiense and rhodesiense human African trypanosomiasis elimination: virtual meeting, 1–3 June 2021 [Internet]. World Health Organization; 2022 [cited 2024 Mar 21]. Available from: <https://iris.who.int/handle/10665/355156>

145. Ministry of Health, Republic of Rwanda. Neglected Tropical Diseases Strategic Plan 2019–2024 [Internet]. 2019 [cited 2024 Mar 21]. Available from: [https://espen.afro.who.int/system/files/content/resources/RWANDA%20NTD%20%20STRATEGIC%20PLAN%202019-2024\\_Signed%20version%20%281%29.pdf](https://espen.afro.who.int/system/files/content/resources/RWANDA%20NTD%20%20STRATEGIC%20PLAN%202019-2024_Signed%20version%20%281%29.pdf)
146. World Health Organization. Report of the third WHO stakeholders meeting on rhodesiense human African trypanosomiasis: Geneva, Switzerland, 10–11 April 2019 [Internet]. World Health Organization; 2020 [cited 2024 Mar 21]. Available from: <https://iris.who.int/handle/10665/336659>
147. Gashururu S R, Maingi N, Githigia SM, Gasana MN, Odhiambo PO, Getange DO, et al. Occurrence, diversity and distribution of Trypanosoma infections in cattle around the Akagera National Park, Rwanda. *PLoS Negl Trop Dis*. 2021;15(12):e0009929. <https://doi.org/10.1371/journal.pntd.0009929> PMID: 34910728
148. Shamsuzzaman AKM, Haq R, Karim MJ, Azad MB, Mahmood ASMS, Khair A, et al. The significant scale up and success of Transmission Assessment Surveys “TAS” for endgame surveillance of lymphatic filariasis in Bangladesh: one step closer to the elimination goal of 2020. *PLoS Negl Trop Dis*. 2017;11(1):e0005340. <https://doi.org/10.1371/journal.pntd.0005340> PMID: 28141812
149. Koporc KM, Hotchkiss DR, Stoecker CF, McFarland DA, Carton T. Assessing the effects of disease-specific programs on health systems: an analysis of the Bangladesh Lymphatic Filariasis Elimination Program’s impacts on health service coverage and catastrophic health expenditure. *PLoS Negl Trop Dis*. 2021;15(11):e0009894. <https://doi.org/10.1371/journal.pntd.0009894> PMID: 34813600
150. Yajima A, Ichimori K. Progress in the elimination of lymphatic filariasis in the Western Pacific Region: successes and challenges. *Int Health*. 2020;13(Supplement\_1):S10–6.
151. Bagcchi S. Laos eliminates lymphatic filariasis. *Lancet Infect Dis*. 2024;24(1):e17. [https://doi.org/10.1016/S1473-3099\(23\)00770-3](https://doi.org/10.1016/S1473-3099(23)00770-3) PMID: 38141647
152. World Health Organization. A health milestone: Lao PDR marks its success in lymphatic filariasis elimination [Internet]. [cited 2024 Mar 18]. Available from: <https://www.who.int/laos/news/detail/27-10-2023-a-health-milestone--lao-pdr-marks-its-success-in-lymphatic-filariasis-elimination>
153. World Health Organization. The Lao People’s Democratic Republic eliminates lymphatic filariasis [Internet]. [cited 2024 Mar 18]. Available from: <https://www.who.int/westernpacific/news/item/16-10-2023-the-lao-people-s-democratic-republic-eliminates-lymphatic-filariasis>
154. World Health Organization Regional Office for South-East Asia. Expert mission to Maldives for verification of elimination of lymphatic filariasis: Report of the Mission, Maldives, 19–26 June 2011. 2012 [cited 2024 Mar 19]; Available from: <https://iris.who.int/handle/10665/205056>
155. Chandrasena N, Premaratna R, Gunaratna IE, de Silva NR. Morbidity management and disability prevention for lymphatic filariasis in Sri Lanka: current status and future prospects. *PLoS Negl Trop Dis*. 2018;12(5):e0006472. <https://doi.org/10.1371/journal.pntd.0006472> PMID: 29746479
156. Dorkenoo MA, de Souza DK, Apetogbo Y, Oboussoumi K, Yehadj D, Tchalim M, et al. Molecular xenomonitoring for post-validation surveillance of lymphatic filariasis in Togo: no evidence for active transmission. *Parasit Vectors*. 2018;11(1):52. <https://doi.org/10.1186/s13071-017-2611-9> PMID: 29361964
157. Pezzoli L, Kim SH, Mathelin JP, Hennessey K, Aratchige PE, Valiakoller J. An expanded transmission assessment survey to confirm the interruption of lymphatic filariasis transmission in wallis and futuna. *Am J Trop Med Hyg*. 2019;101(6):1325–30.
158. Ecuador Ministerio de Salud Pública. La OPS/OMS y el Centro Carter felicitan a Ecuador por lograr la eliminación de la oncocercosis – Ministerio de Salud Pública [Internet]. [cited 2024 Mar 20]. Available from: <https://www.salud.gob.ec/la-opsoms-y-el-centro-carter-felicitan-a-ecuador-por-lograr-la-eliminacion-de-la-oncocercosis/>
159. Rodríguez-Pérez MA, Fernández-Santos NA, Orozco-Algarra ME, Rodríguez-Atanacio JA, Domínguez-Vázquez A, Rodríguez-Morales KB, et al. Elimination of onchocerciasis from Mexico. *PLoS Negl Trop Dis*. 2015;9(7):e0003922. <https://doi.org/10.1371/journal.pntd.0003922> PMID: 26161558
160. Aréchiga Ceballos N, Puebla Rodríguez P, Aguilar Setién Á. The new face of human rabies in Mexico, what’s next after eradicating rabies in dogs. *Vector Borne Zoonotic Dis*. 2022;22(2):69–75. <https://doi.org/10.1089/vbz.2021.0051> PMID: 35175137
161. Vigilato MAN, Clavijo A, Knobl T, Silva HMT, Cosivi O, Schneider MC, et al. Progress towards eliminating canine rabies: policies and perspectives from Latin America and the Caribbean. *Philos Trans R Soc Lond B Biol Sci*. 2013;368(1623):20120143. <https://doi.org/10.1098/rstb.2012.0143> PMID: 23798691
162. Organización Panamericana de la Salud. Eliminación de la rabia humana transmitida por perros en América Latina: Análisis de la situación [Internet]. Organización Panamericana de la Salud; 2005 [cited 2024 Mar 20]. Available from: <https://www3.paho.org/spanish/ad/dpc/vp/rabia-sit.pdf>
163. Issifou AAB, Dare A, Badou GA, Harding-Esch EM, Solomon AW, Bakhtiari A. Twenty-three population-based trachoma prevalence surveys in the central and northern regions of Benin, 2018–2022. *Ophthalmol Epidemiol*. 2023;0(0):1–11.
164. World Health Organization. Cambodia Eliminates Trachoma – Leading Infectious Cause of Blindness [Internet]. [cited 2024 Mar 21]. Available from: <https://www.who.int/cambodia/news/detail/12-10-2017-cambodia-eliminates-trachoma-leading-infectious-cause-of-blindness> World Health Organization
165. International Coalition for Trachoma Control. Cambodia and the Lao People’s Democratic Republic officially eliminate trachoma as a public health problem [Internet]. [cited 2024 Mar 21]. Available from: <https://www.trachomacoalition.org/news-blogs/cambodia-and-lao-people%E2%80%99s-democratic-republic-officially-eliminate-trachoma-public-health>
166. Qian M-B, Chen J, Bergquist R, Li Z-J, Li S-Z, Xiao N, et al. Neglected tropical diseases in the People’s Republic of China: progress towards elimination. *Infect Dis Poverty*. 2019;8(1):86. <https://doi.org/10.1186/s40249-019-0599-4> PMID: 31578147
167. Hu A, Wang N. Enlightenment of blinding trachoma elimination in China. *Sci China Life Sci*. 2017;60(12).



168. Malawi Ministry of Health. Malawi NTD Master 2015–2020 [Internet]. 2014 [cited 2024 Mar 21]. Available from: [https://espen.afro.who.int/system/files/content/resources/MALAWI\\_NTD\\_Master\\_Plan\\_2015\\_2020.pdf](https://espen.afro.who.int/system/files/content/resources/MALAWI_NTD_Master_Plan_2015_2020.pdf)
169. Burr SE, Hart J, Samikwa L, Chaima D, Cooley G, Martin D, et al. Pgp3 seroprevalence and associations with active trachoma and ocular *Chlamydia trachomatis* infection in Malawi: cross-sectional surveys in six evaluation units. PLoS Negl Trop Dis. 2019;13(10):e0007749. <https://doi.org/10.1371/journal.pntd.0007749> PMID: 31658258
170. Traoré L, Dembele B, Keita M, Reid SD, Dembélé M, Mariko B, et al. Prevalence of trachoma in the Kayes region of Mali eight years after stopping mass drug administration. PLoS Negl Trop Dis. 2018;12(2):e0006289. <https://doi.org/10.1371/journal.pntd.0006289> PMID: 29432434
171. Sharma S, Ngondi JM, Mishra S, Prasad RD, Crowley K, Bonuedi D, et al. Completing baseline mapping of trachoma in Nepal: results of 27 population-based prevalence surveys conducted in 2013 and 2014. Ophthalmic Epidemiol. 2018;25(sup1):115–20. <https://doi.org/10.1080/09286586.2018.1489972> PMID: 30806546
172. Bakoubayi AW, Gadah DAY, Gnosike P, Zida-Compaore WIC, Bando PP, Alaglo K, et al. The elimination of trachoma as a public health problem in Togo: successes and challenges. PLoS Negl Trop Dis. 2023;17(7):e0011444. <https://doi.org/10.1371/journal.pntd.0011444> PMID: 37463175
173. World Health Organization. Vanuatu leads the way for Pacific elimination of trachoma – the world's biggest infectious cause of blindness [Internet]. [cited 2024 Mar 21]. Available from: <https://www.who.int/westernpacific/about/how-we-work/pacific-support/news/detail/12-08-2022-vanuatu-leads-the-way-for-pacific-elimination-of-trachoma---the-world-s-biggest-infectious-cause-of-blindness>
174. International Coalition for Trachoma Control. Vanuatu eliminates trachoma as a public health problem [Internet]. [cited 2024 Mar 21]. Available from: <https://www.trachomacoalition.org/news-blogs/vanuatu-eliminates-trachoma-public-health-problem>
175. Taleo F, Macleod CK, Marks M, Sokana O, Last A, Willis R, et al. Integrated mapping of yaws and trachoma in the five northern-most provinces of Vanuatu. PLoS Negl Trop Dis. 2017;11(1):e0005267. <https://doi.org/10.1371/journal.pntd.0005267> PMID: 28118354
176. Ghosh D, Alim A, Huda MM, Halleux CM, Almahmud M, Oliario PL, et al. Comparison of novel sandfly control interventions: a pilot study in Bangladesh. Am J Trop Med Hyg. 2021;105(6):1786–94. <https://doi.org/10.4269/ajtmh.20-0997> PMID: 34695792
177. Fitzpatrick A, Al-Kobaisi NSMS, Beitman Maya J, Ren Chung Y, Duhan S, Elbegdorj E, et al. Sustaining visceral leishmaniasis elimination in Bangladesh - Could a policy brief help?. PLoS Negl Trop Dis. 2017;11(12):e0006081. <https://doi.org/10.1371/journal.pntd.0006081> PMID: 29232385
178. Narain JP, Jain SK, Bora D, Venkatesh S. Eradicating successfully yaws from India: the strategy & global lessons. Indian J Med Res. 2015;141(5):608–13. <https://doi.org/10.4103/0971-5916.159542> PMID: 26139778
179. Ministry of Health and Family Welfare, Government of India. Yaws Eradication Programme [Internet]. National Centre for Disease Control (NCDC). [cited 2024 Apr 14]. Available from: <https://ncdc.mohfw.gov.in/yaws-eradication-programme/>
180. The International Agency for the Prevention of Blindness. The International Agency for the Prevention of Blindness. [cited 2024 Jun 14]. Cambodia and the Lao People's Democratic Republic eliminate trachoma. Available from: <https://www.iapb.org/news/cambodia-and-the-lao-peoples-democratic-republic-eliminate-trachoma/>
181. Faria S, Hossain SM, Islam MS, Chowdhury V, Chowdhury R. Assessment of knowledge, attitudes, and practices toward kala-azar in an endemic district in Bangladesh: a cross-sectional survey. Am J Trop Med Hyg. 2023;108(4):783–90.
182. Sokunbi TO, Unnithan V, Unim B, Odhiambo J, Dauda Z, Effiong FB. Trachoma elimination in Togo: lessons and recommendations for African countries. Pathog Glob Health. 2023;117(2):99–100. <https://doi.org/10.1080/20477724.2022.2136602> PMID: 36254374
183. Ministry of Health and Social Welfare, Republic of the Gambia. National Master Plan for Neglected Tropical Diseases 2015–2020 [Internet]. 2014. Available from: [https://espen.afro.who.int/system/files/content/resources/GAMBIA\\_NTD\\_Master\\_Plan\\_2015\\_2020.pdf](https://espen.afro.who.int/system/files/content/resources/GAMBIA_NTD_Master_Plan_2015_2020.pdf)
184. Ministère de la Santé et de l'Hygiène Publique, Secrétariat Général, Direction National de la Santé, République du Mali. Plan Directeur de Lutte Contre les Maladies Tropicales Négligées (M.T.N) 2017–2021 [Internet]. [cited 2024 Mar 21]. Available from: [https://espen.afro.who.int/system/files/content/resources/MALI\\_NTD\\_Master\\_Plan\\_2017\\_2021.pdf](https://espen.afro.who.int/system/files/content/resources/MALI_NTD_Master_Plan_2017_2021.pdf)
185. Global Health Progress. The London Declaration on NTDs [Internet]. Global Health Progress. [cited 2024 Aug 10]. Available from: <https://global-healthprogress.org/collaboration/the-london-declaration-on-ntds/>
186. Uniting to Combat NTDs. Uniting to Combat NTDs [Internet]. [cited 2024 Jan 17]. Available from: <https://unitingtocombatntds.org/en/>
187. World Health Organization. Report of the first stakeholders meeting on gambiense human African trypanosomiasis elimination, Geneva, 25–27 March 2014. 2014 [cited 2024 Mar 21]; Available from: <https://iris.who.int/handle/10665/147021>
188. World Health Organization. Kiribati eliminates lymphatic filariasis [Internet]. [cited 2024 Mar 20]. Available from: <https://www.who.int/westernpacific/news/item/07-10-2019-kiribati-eliminates-lymphatic-filariasis>
189. The Carter Center. Mexico [Internet]. [cited 2024 Mar 20]. Available from: <https://www.cartercenter.org/countries/mexico.html>
190. Chandrasena NTGA, Premaratna R, Samarasekera DS, de Silva NR. Surveillance for transmission of lymphatic filariasis in Colombo and Gampaha districts of Sri Lanka following mass drug administration. Trans R Soc Trop Med Hyg. 2016;110(10):620–2. <https://doi.org/10.1093/trstmh/trw067> PMID: 27816936
191. Pan American Health Organization. WHO verifies that Guatemala is the fourth country in the world to eliminate transmission of “river blindness” [Internet]. 2016 [cited 2024 Mar 20]. Available from: <https://www.paho.org/en/news/8-12-2016-who-verifies-guatemala-fourth-country-world-eliminate-transmission-river-blindness-0>



192. International Coalition for Trachoma Control. Saudi Arabia eliminates trachoma as a public health problem [Internet]. [cited 2024 Mar 21]. Available from: <https://www.trachomacoalition.org/news-blogs/saudi-arabia-eliminates-trachoma-public-health-problem>
193. Ichimori K, Graves PM. Overview of PacELF—the Pacific programme for the elimination of lymphatic filariasis. *Trop Med Health*. 2017;45(1):34.
194. Ichimori K, Crump A. Pacific collaboration to eliminate lymphatic filariasis. *Trends Parasitol*. 2005;21(10):441–4. <https://doi.org/10.1016/j.pt.2005.08.010> PMID: 16099721
195. Meredith S, den Boer M, Burza S, Croft SL. KalaCORE: a programme to tackle visceral leishmaniasis in south Asia and east Africa (2014–2019). Challenges and solutions against visceral Leishmaniasis. Springer Nature Singapore. 2023. p. 19–41. [https://doi.org/10.1007/978-981-99-6999-9\\_2](https://doi.org/10.1007/978-981-99-6999-9_2)
196. World Health Organization. Evaluation of the dracunculiasis surveillance system in 4 districts in Ghana [Internet]. [cited 2024 Mar 24]. Available from: <https://www.who.int/publications-detail-redirect/who-wer8032>
197. U.S. Centers for Disease Control and Prevention. Update: Dracunculiasis Eradication -- Mali and Niger, 1993 [Internet]. [cited 2024 Mar 25]. Available from: <https://www.cdc.gov/mmwr/preview/mmwrhtml/00023756.htm>
198. Ndung'u JM, Boulangé A, Picado A, Mugenyi A, Mortensen A, Hope A, et al. Trypa-NO! contributes to the elimination of gambiense human African trypanosomiasis by combining tsetse control with "screen, diagnose and treat" using innovative tools and strategies. *PLoS Negl Trop Dis*. 2020;14(11):e0008738. <https://doi.org/10.1371/journal.pntd.0008738> PMID: 33180776
199. Ministère de la Santé et de l'Action Sociale, Sénégal. Plan stratégique national de lutte contre les maladies tropicales négligées 2022-2025 Sénégal [Internet]. Available from: <https://espen.afro.who.int/system/files/content/resources/VFF%20Plan%20national%20strat%C3%A9gique%202022-2025%20Senegal.pdf>
200. World Health Organization Country Office for Maldives. Maldives: a journey of health [Internet]. 2017 [cited 2024 Mar 19]. Available from: <https://iris.who.int/handle/10665/259178>
201. United States Agency for International Development. Neglected Tropical Disease Program. 2018 [cited 2024 Mar 20]. Vietnam Eliminates Lymphatic Filariasis as a Public Health Problem. Available from: <https://www.neglecteddiseases.gov/vietnam-eliminates-lymphatic-filariasis-as-a-public-health-problem/>
202. Sogbesan E, Yutho U. Cambodia's national eye care programme and VISION 2020: The Right to Sight. *Comm Eye Health*. 2000;13(36):57–9.
203. World Health Organization Regional Office for the Western Pacific. The PacELF way: towards the elimination of lymphatic filariasis from the Pacific, 1999–2005 [Internet]. 2006 [cited 2024 May 7]. Available from: <https://iris.who.int/handle/10665/208189>
204. Chowdhury R, Chowdhury V, Faria S, Akter S, Dash AP, Bhattacharya SK, et al. Effect of insecticide-treated bed nets on visceral leishmaniasis incidence in Bangladesh. A retrospective cohort analysis. *PLoS Negl Trop Dis*. 2019;13(9):e0007724. <https://doi.org/10.1371/journal.pntd.0007724> PMID: 31525195
205. Berrang-Ford L, Odiit M, Maiso F, Waltner-Toews D, McDermott J. Sleeping sickness in Uganda: revisiting current and historical distributions. *Afr Health Sci*. 2006;6(4):223–31. <https://doi.org/10.5555/afhs.2006.6.4.223> PMID: 17604511
206. Picado A, Ndung'u J. Elimination of sleeping sickness in Uganda could be jeopardised by conflict in South Sudan. *Lancet Glob Health*. 2017 Jan 1;5(1):e28–9.
207. Velasco-Villa A, Escobar LE, Sanchez A, Shi M, Streicker DG, Gallardo-Romero NF. Successful strategies implemented towards the elimination of canine rabies in the Western Hemisphere. *Antiviral Res*. 2017;143:1–12.
208. Glenn J, Kamara K, Umar ZA, Chahine T, Daulaire N, Bossert T. Applied systems thinking: a viable approach to identify leverage points for accelerating progress towards ending neglected tropical diseases. *Health Res Policy Syst*. 2020;18(1):56. <https://doi.org/10.1186/s12961-020-00570-4> PMID: 32493485
209. Butala CB, Cave RNR, Fyfe J, Coleman PG, Yang GJ, Welburn SC. Impact of COVID-19 on the neglected tropical diseases: a scoping review. *Infect Dis Poverty*. 2024;13:55.
210. Barrett MP, Priotto G, Franco JR, Lejon V, Lindner AK. Elimination of human African trypanosomiasis: The long last mile. *PLoS Negl Trop Dis*. 2024;18(5):e0012091. <https://doi.org/10.1371/journal.pntd.0012091> PMID: 38691551
211. Glenn J, Adams AB, Sankar G, Henry C, Palacio K, Thuo W, et al. Towards a shared understanding of sustainability for neglected tropical disease programs. *PLoS Negl Trop Dis*. 2021;15(8):e0009595. <https://doi.org/10.1371/journal.pntd.0009595> PMID: 34415903
212. Republic of the Gambia, Ministry of Health. Neglected Tropical Diseases Master Plan (2023–2027) [Internet]. 2023 [cited 2024 Aug 29]. Available from: <https://espen.afro.who.int/system/files/content/resources/THE%20GAMBIA%20NTD%20MASTER%20PLAN%202023-2027.pdf>
213. The World Bank. The World by Income and Region [Internet]. [cited 2024 May 9]. Available from: <https://datatopics.worldbank.org/world-development-indicators/the-world-by-income-and-region.html>
214. Huang XX, Toure H, Biswas G. Resource tracking for neglected tropical disease programmes: the first step for developing a sustainable financing strategy. *Trans R Soc Trop Med Hyg*. 2021;115(2):179–81.
215. Standley C, Boyce MR, Klineberg A, Essix G, Katz R. Organization of oversight for integrated control of neglected tropical diseases within Ministries of Health. *PLoS Negl Trop Dis*. 2018;12(11):e0006929. <https://doi.org/10.1371/journal.pntd.0006929> PMID: 30462639
216. The White House. Reevaluating And Realignment United States Foreign Aid [Internet]. 2025 [cited 2025 Jun 12]. Available from: <https://www.white-house.gov/presidential-actions/2025/01/reevaluating-and-realigning-united-states-foreign-aid/>

217. Foreign, Commonwealth & Development Office, HM Treasury, Rt Hon Baroness Chapman of Darlington. GOV.UK. [cited 2025 Jun 12]. Future international development spending set out in Spring Statement. Available from: <https://www.gov.uk/government/news/future-international-development-spending-set-out-in-spring-statement>
218. Hooper PJ, Zoerhoff KL, Kyelem D, Chu B, Mann Flueckiger R, Bamani S. The effects of integration on financing and coverage of neglected tropical disease programs. *Am J Trop Med Hyg*. 2013;89(3):407–10.
219. Marchal B, Van Dormael M, Pirard M, Cavalli A, Kegels G, Polman K. Neglected tropical disease (NTD) control in health systems: the interface between programmes and general health services. *Acta Trop*. 2011;120(S):S177–85.
220. Johnston EA, Teague J, Graham JP. Challenges and opportunities associated with neglected tropical disease and water, sanitation and hygiene intersectoral integration programs. *BMC Public Health*. 2015;15:547. <https://doi.org/10.1186/s12889-015-1838-7> PMID: 26062691
221. Sodahlon Y, Ross DA, McPhillips-Tangum C, Lawrence J, Taylor R, McFarland DA, et al. Building country capacity to sustain NTD programs and progress: a call to action. *PLoS Negl Trop Dis*. 2020;14(10):e0008565. <https://doi.org/10.1371/journal.pntd.0008565> PMID: 33031387
222. Ehrenberg JP, Utzinger J, Fontes G, da Rocha EMM, Ehrenberg N, Zhou X-N, et al. Efforts to mitigate the economic impact of the COVID-19 pandemic: potential entry points for neglected tropical diseases. *Infect Dis Poverty*. 2021;10(1):2. <https://doi.org/10.1186/s40249-020-00790-4> PMID: 33397510
223. Ortu G, Williams O. Neglected tropical diseases: exploring long term practical approaches to achieve sustainable disease elimination and beyond. *Infect Dis Poverty*. 2017;6(1):147. <https://doi.org/10.1186/s40249-017-0361-8> PMID: 28950893
224. Goldberg J, Bryant M. Country ownership and capacity building: the next buzzwords in health systems strengthening or a truly new approach to development?. *BMC Public Health*. 2012;12:531. <https://doi.org/10.1186/1471-2458-12-531> PMID: 22818046
225. Rai V. Neglected tropical diseases of public health importance in India: current status and the way ahead. *Int J Trop Dis Health*. 2022;:17–24.
226. Laing G. A year of One Health and neglected tropical diseases. *Int Health*. 2023;15(5):477–9. <https://doi.org/10.1093/inthealth/ihad043> PMID: 37337913
227. Branda F, Ali AY, Ceccarelli G, Albanese M, Binetti E, Giovanetti M, et al. Assessing the burden of neglected tropical diseases in low-income communities: challenges and solutions. *Viruses*. 2024;17(1):29. <https://doi.org/10.3390/v17010029> PMID: 39861818
228. Onwe FI, Okedo-Alex IN, Akamike IC, Igwe-Okomiso DO. Vertical disease programs and their effect on integrated disease surveillance and response: perspectives of epidemiologists and surveillance officers in Nigeria. *Trop Dis Travel Med Vaccines*. 2021;7(1):28. <https://doi.org/10.1186/s40794-021-00152-4> PMID: 34593034
229. Ministère de la Santé et Bien-Être Social, République de Guinée Ecuatorial. Plan Directeur de Lutte Contre les Maladies Tropicales Négligées (MTN) 2018-2022 [Internet]. 2017. Available from: [https://espen.afro.who.int/system/files/content/resources/EQUATORIAL\\_GUINEA\\_NTD\\_Master\\_Plan\\_2018\\_2022.pdf](https://espen.afro.who.int/system/files/content/resources/EQUATORIAL_GUINEA_NTD_Master_Plan_2018_2022.pdf)
230. Gatome-Munyua A, Sparkes S, Mtei G, Sabignoso M, Soewondo P, Yameogo P. Reducing fragmentation of primary healthcare financing for more equitable, people-centred primary healthcare. *BMJ Glob Health*. 2025;10(1):e015088.
231. Karutu C, Ansumana R, Souza DK de, Njenga S, Coulbaly YI, Lee SS. Towards elimination of Neglected Tropical Diseases: strengthening partnerships, fostering collaboration, and promoting country ownership. *Int J Infect Dis*. 2025;152.
232. World Health Organization. Ending the neglect to attain the sustainable development goals: a strategic framework for integrated control and management of skin-related neglected tropical diseases [Internet]. [cited 2024 May 11]. Available from: <https://www.who.int/publications-detail-redirect/9789240051423>
233. International Coalition for Trachoma Control. Integrating “ocular” NTDs [Internet]. [cited 2024 Aug 25]. Available from: <https://www.trachomacoalition.org/news-blogs/integrating-ocular-ntds>
234. Dean L, Tolhurst R, Nallo G, Kollie K, Bettee A, Theobald S. Neglected tropical disease as a “biographical disruption”: Listening to the narratives of affected persons to develop integrated people centred care in Liberia. *PLoS Negl Trop Dis*. 2019;13(9):e0007710. <https://doi.org/10.1371/journal.pntd.0007710> PMID: 31490931
235. Kruk ME, Gage AD, Arsenault C, Jordan K, Leslie HH, Roder-DeWan S. High-quality health systems in the Sustainable Development Goals era: time for a revolution. *Lancet Glob Health*. 2018;6(11):e1196–252.
236. Bogale B, Scambler S, Mohd Khairuddin AN, Gallagher JE. Health system strengthening in fragile and conflict-affected states: a review of systematic reviews. *PLoS One*. 2024;19(6):e0305234. <https://doi.org/10.1371/journal.pone.0305234> PMID: 38875266
237. France 24. Sudan war destroys world’s only research centre on skin disease mycetoma: director [Internet]. 2025 [cited 2025 Jun 12]. Available from: <https://www.france24.com/en/live-news/20250424-sudan-war-destroys-world-s-only-research-centre-on-skin-disease-mycetoma-director>
238. World Health Organization. Dire health and humanitarian crisis in eastern Democratic Republic of the Congo prompts escalation of efforts by WHO, partners [Internet]. [cited 2025 Jun 12]. Available from: <https://www.who.int/news/item/07-02-2025-dire-health-and-humanitarian-crisis-in-eastern-democratic-republic-of-the-congo-prompts-escalation-of-efforts-by-who--partners>
239. Department of Rural Economy and Agriculture, African Union Commission. Pan African Tsetse and Trypanosomosis Eradication Campaign [Internet]. [cited 2024 May 11]. Available from: [https://au.int/sites/default/files/documents/32884-doc-how\\_the\\_pattec\\_initiative\\_can\\_be\\_supported.pdf](https://au.int/sites/default/files/documents/32884-doc-how_the_pattec_initiative_can_be_supported.pdf)
240. World Health Organization. WHO validates the elimination of trachoma as a public health problem in Pakistan [Internet]. [cited 2024 Oct 6]. Available from: <https://www.who.int/news/item/01-10-2024-who-validates-the-elimination-of-trachoma-as-a-public-health-problem-in-pakistan>

241. World Health Organization. Viet Nam eliminates trachoma as a public health problem [Internet]. [cited 2024 Oct 24]. Available from: <https://www.who.int/news/item/21-10-2024-viet-nam-eliminates-trachoma-as-a-public-health-problem>
242. World Health Organization. Elimination of trachoma as a public health problem in India [Internet]. [cited 2024 Oct 24]. Available from: <https://www.who.int/southeastasia/news/feature-stories/detail/elimination-of-trachoma-as-a-public-health-problem-in-india>
243. World Health Organization. WHO validates Mauritania for eliminating trachoma as a public health problem [Internet]. [cited 2025 May 30]. Available from: <https://www.who.int/news/item/19-05-2025-who-validates-mauritania-for-eliminating-trachoma-as-a-public-health-problem>
244. World Health Organization. WHO verifies Niger as the first country in the African Region to eliminate onchocerciasis [Internet]. [cited 2025 May 30]. Available from: <https://www.who.int/news/item/30-01-2025-who-verifies-niger-as-the-first-country-in-the-african-region-to-eliminate-onchocerciasis>
245. De Neve J-W, Andriantavison RL, Croke K, Krisam J, Rajoela VH, Rakotoarivony RA, et al. Health, financial, and education gains of investing in preventive chemotherapy for schistosomiasis, soil-transmitted helminthiasis, and lymphatic filariasis in Madagascar: a modeling study. *PLoS Negl Trop Dis*. 2018;12(12):e0007002. <https://doi.org/10.1371/journal.pntd.0007002> PMID: [30589847](https://pubmed.ncbi.nlm.nih.gov/30589847/)
246. World Health Organization. Surveillance in emergencies [Internet]. [cited 2024 Apr 24]. Available from: <https://www.who.int/emergencies/surveillance>
247. Habtamu E, Wondie T, Aweke S, Tadesse Z, Zerihun M, Gashaw B. Predictors of trachomatous trichiasis surgery outcome. *Ophthalmology*. 2017;124(8):1143–55.
248. Khandekar RB, Al Harby SS, Vora UP. Lid surgery for trachomatous trichiasis is negatively associated with visual disabilities and visual impairment in Oman. *East Mediterr Health J*. 2012;18(11):1107–13. <https://doi.org/10.26719/2012.18.11.1107> PMID: [23301372](https://pubmed.ncbi.nlm.nih.gov/23301372/)
249. World Health Organization. Case containment strategy [Internet]. [cited 2024 Apr 24]. Available from: <https://www.who.int/teams/control-of-neglected-tropical-diseases/dracunculiasis/case-containment-strategy>
250. The Carter Center. THE CARTER CENTER NEWS [Internet]. 2002. Available from: <https://www.cartercenter.org/documents/1053.pdf#page=9>
251. Dyer CEF, Kalua K, Chisambi AB, Wand H, McManus H, Liu B, et al. Water, Sanitation, and Hygiene (WASH) factors influencing the effectiveness of mass drug administration to eliminate trachoma as a public health problem in Malawi. *Ophthalmic Epidemiol*. 2024;31(2):127–33. <https://doi.org/10.1080/09286586.2023.2194409> PMID: [36987395](https://pubmed.ncbi.nlm.nih.gov/36987395/)
252. World Health Organization. Indoor residual spraying: an operational manual for IRS for malaria transmission, control and elimination [Internet]. [cited 2024 May 11]. Available from: <https://www.who.int/publications-detail-redirect/9789241508940>
253. Pan American Health Organization. Who We Are [Internet]. [cited 2024 Apr 23]. Available from: <https://www.paho.org/en/who-we-are>
254. The Carter Center. Guinea Worm Eradication Program [Internet]. [cited 2024 Jan 17]. Available from: [https://www.cartercenter.org/health/guinea\\_worm/index.html](https://www.cartercenter.org/health/guinea_worm/index.html)
255. The Carter Center. Togo [Internet]. [cited 2024 Mar 25]. Available from: <https://www.cartercenter.org/countries/togo.html>
256. The Carter Center. Onchocerciasis Elimination Program for the Americas (OEPA) [Internet]. [cited 2024 Apr 23]. Available from: [https://www.cartercenter.org/health/river\\_blindness/oepe.html](https://www.cartercenter.org/health/river_blindness/oepe.html)
257. Liverpool School of Tropical Medicine. LSTM. [cited 2024 Apr 26]. World NTD Day: How tsetse control programme Tiny Targets helped to eliminate sleeping sickness in Uganda. Available from: <https://www.lstmed.ac.uk/news-events/news/world-ntd-day-how-tsetse-control-programme-tiny-targets-helped-to-eliminate>
258. Steverding D. The history of African trypanosomiasis. *Parasit Vectors*. 2008;1(1):3. <https://doi.org/10.1186/1756-3305-1-3> PMID: [18275594](https://pubmed.ncbi.nlm.nih.gov/18275594/)
